# Supplementary material for: The MicroRNA397a-LACCASE17 module regulates lignin biosynthesis in Medicago ruthenica (L.)
Source: Front Plant Sci. 2022 Aug 18;13:978515. doi: 10.3389/fpls.2022.978515 (PMC9434696; doi:10.3389/fpls.2022.978515)
Supplement: Supplementary file 2 [file Data_Sheet_2.xlsx]

## Sheet: Table S3
Table S3. DEGs generated from two cultivars of M. ruthenica stems
GeneID	log2 FC(Mengnong No.1/Zhilixing)	FDR	Annotation
TRINITY_DN7054_c0_g1	-11.93	5.86e-42	RALF [Medicago truncatula]
TRINITY_DN15285_c1_g1	-13.1	9e-41	uncharacterized protein LOC112422609 [Medicago truncatula]
TRINITY_DN11477_c0_g2	8.94	6.26e-33	defensin [Arachis diogoi]
TRINITY_DN9174_c0_g1	-9.63	4.23e-30	BURP domain protein RD22 [Medicago truncatula]
TRINITY_DN19025_c0_g1	12.03	3.58e-18	-
TRINITY_DN16997_c0_g2	-11.52	3.58e-18	putative disease resistance protein RGA3 [Medicago truncatula]
TRINITY_DN13410_c1_g3	5.42	5.27e-18	heat shock protein 17.6 [Medicago sativa]
TRINITY_DN12982_c1_g5	10.99	9.14e-18	22.7 kDa class IV heat shock protein [Medicago truncatula]
TRINITY_DN17278_c1_g4	11.91	1.12e-16	-
TRINITY_DN16862_c0_g7	7.43	4.45e-15	small heat shock protein, chloroplastic [Medicago truncatula]
TRINITY_DN14053_c0_g3	6.09	2.94e-14	18.1 kDa class I heat shock protein [Medicago truncatula]
TRINITY_DN14010_c0_g6	9.57	1.79e-12	class I heat shock protein [Medicago truncatula]
TRINITY_DN14637_c0_g1	10.76	1.22e-11	non-LTR retrolelement reverse transcriptase-like protein, related [Medicago truncatula]
TRINITY_DN11948_c1_g4	-7.05	2.27e-11	hypothetical protein MTR_3g455890 [Medicago truncatula]
TRINITY_DN17021_c1_g8	10.88	3.18e-11	-
TRINITY_DN10236_c0_g1	6.64	2.14e-10	leguminosin proline-rich group669 secreted peptide [Medicago truncatula]
TRINITY_DN16940_c0_g2	8.82	3.31e-10	uncharacterized protein LOC112422067 [Medicago truncatula]
TRINITY_DN13179_c0_g2	-10.49	4.27e-10	plastidic glucose transporter 4 isoform X1 [Medicago truncatula]
TRINITY_DN18857_c2_g1	6.86	7.48e-10	putative CCA tRNA nucleotidyltransferase 2 [Medicago truncatula]
TRINITY_DN14448_c0_g1	-10.54	8.08e-10	metacaspase-7 [Medicago truncatula]
TRINITY_DN14370_c0_g1	10.15	3.92e-09	F-box/kelch-repeat protein At3g61590 [Medicago truncatula]
TRINITY_DN14740_c0_g2	10.06	1.11e-08	-
TRINITY_DN16615_c1_g1	5.83	1.11e-08	folylpolyglutamate synthase isoform X2 [Medicago truncatula]
TRINITY_DN18197_c3_g1	6.13	1.35e-08	eukaryotic translation initiation factor 4G isoform X2 [Medicago truncatula]
TRINITY_DN15888_c0_g1	10.49	1.83e-08	-
TRINITY_DN15819_c0_g2	7.02	2.25e-08	putative geraniol 8-hydroxylase [Medicago truncatula]
TRINITY_DN17939_c1_g1	8.65	8.61e-08	-
TRINITY_DN18104_c1_g6	-7.61	9.18e-08	-
TRINITY_DN14357_c0_g3	8.22	1.16e-07	uncharacterized protein LOC11438664 [Medicago truncatula]
TRINITY_DN18399_c2_g6	-10.35	1.39e-07	-
TRINITY_DN7761_c0_g2	9.72	1.67e-07	hypothetical protein TSUD_114680 [Trifolium subterraneum]
TRINITY_DN15998_c0_g1	6.63	4.59e-07	-
TRINITY_DN16384_c0_g4	9.61	4.8e-07	hypothetical protein TSUD_166060 [Trifolium subterraneum]
TRINITY_DN17224_c1_g6	-6.1	5.32e-07	paired amphipathic helix protein Sin3-like 1 [Medicago truncatula]
TRINITY_DN15931_c0_g2	-9.66	6.57e-07	protein FAR1-RELATED SEQUENCE 5-like [Medicago truncatula]
TRINITY_DN18689_c0_g1	6.64	6.9e-07	-
TRINITY_DN17022_c0_g4	-14.96	1.22e-06	hypothetical protein MtrunA17_Chr1g0170461 [Medicago truncatula]
TRINITY_DN8230_c0_g1	9.77	1.74e-06	-
TRINITY_DN14054_c0_g3	-2.52	1.77e-06	-
TRINITY_DN18468_c0_g1	-7.58	2.23e-06	F-box protein At3g07870 isoform X1 [Medicago truncatula]
TRINITY_DN14810_c0_g2	7.09	2.6e-06	-
TRINITY_DN18399_c2_g3	13.32	4.21e-06	transmembrane protein, putative [Medicago truncatula]
TRINITY_DN16367_c1_g2	3.73	4.36e-06	heat shock 70 kDa protein 16-like isoform X1 [Abrus precatorius]
TRINITY_DN15504_c0_g1	9.73	4.83e-06	-
TRINITY_DN15745_c1_g1	7.22	4.83e-06	-
TRINITY_DN17440_c0_g1	9.23	5.49e-06	replication factor A protein 1 [Medicago truncatula]
TRINITY_DN18595_c0_g2	5.32	6.46e-06	hypothetical protein TSUD_411640, partial [Trifolium subterraneum]
TRINITY_DN18335_c0_g1	4.57	6.48e-06	rust resistance kinase Lr10 isoform X1 [Medicago truncatula]
TRINITY_DN18810_c0_g4	-7.7	7.25e-06	-
TRINITY_DN9419_c0_g1	-12.42	7.63e-06	uncharacterized protein LOC101506735, partial [Cicer arietinum]
TRINITY_DN19138_c0_g1	-10.06	7.71e-06	-
TRINITY_DN11972_c0_g11	2.87	8.38e-06	hypothetical chloroplast RF19 (chloroplast) [Medicago hybrida]
TRINITY_DN161_c0_g1	12.44	8.72e-06	cytochrome c oxidase subunit 1 (mitochondrion) [Roya obtusa]
TRINITY_DN13686_c0_g2	9.36	1.02e-05	-
TRINITY_DN16314_c1_g3	5.51	1.12e-05	uncharacterized protein LOC101504131 [Cicer arietinum]
TRINITY_DN18772_c1_g1	7.4	1.6e-05	-
TRINITY_DN113_c0_g1	9.51	1.67e-05	hypothetical protein MtrunA17_Chr4g0070671 [Medicago truncatula]
TRINITY_DN15584_c1_g6	-8.2	2.04e-05	uncharacterized protein LOC102669387 [Glycine max]
TRINITY_DN7449_c0_g1	-6.14	2.43e-05	Ty3/gypsy retrotransposon protein, partial [Trifolium pratense]
TRINITY_DN12663_c2_g1	7.56	2.43e-05	-
TRINITY_DN13625_c0_g5	9.07	2.74e-05	-
TRINITY_DN6360_c0_g1	6.43	2.82e-05	gibberellin 2-beta-dioxygenase 8 [Medicago truncatula]
TRINITY_DN15387_c0_g1	8.5	3.07e-05	hypothetical protein MtrunA17_Chr7g0260151 [Medicago truncatula]
TRINITY_DN482_c0_g1	11.79	3.07e-05	cytochrome c oxidase subunit 3 (mitochondrion) [Nephroselmis olivacea]
TRINITY_DN17265_c0_g1	3.11	3.11e-05	ATP-dependent DNA helicase Q-like SIM isoform X2 [Medicago truncatula]
TRINITY_DN13203_c0_g5	-4.1	4.07e-05	putative HAT dimerization domain, ribonuclease H-like domain, hAT-like transposase, RNase-H [Medicago truncatula]
TRINITY_DN6117_c0_g1	10.63	4.07e-05	RALF [Medicago truncatula]
TRINITY_DN15870_c0_g4	-3.01	4.78e-05	putative amino acid transporter, transmembrane domain-containing protein [Medicago truncatula]
TRINITY_DN17056_c0_g8	-8.74	4.86e-05	-
TRINITY_DN18916_c0_g7	2.66	5.81e-05	hypothetical protein MTR_5g009535 [Medicago truncatula]
TRINITY_DN14908_c0_g1	-5.74	5.82e-05	-
TRINITY_DN15043_c0_g1	8.62	6.01e-05	-
TRINITY_DN16439_c0_g3	-9.98	6.09e-05	-
TRINITY_DN14803_c0_g1	-3.52	6.09e-05	uncharacterized protein LOC110421976 [Herrania umbratica]
TRINITY_DN16624_c1_g7	-8.68	6.3e-05	copia-type polyprotein, partial [Trifolium pratense]
TRINITY_DN18371_c2_g4	-6.1	6.62e-05	-
TRINITY_DN18299_c1_g5	-7.06	6.62e-05	-
TRINITY_DN17300_c1_g6	3.92	6.9e-05	stachyose synthase [Medicago truncatula]
TRINITY_DN14768_c1_g1	-10.08	7.37e-05	hypothetical protein TSUD_102880 [Trifolium subterraneum]
TRINITY_DN15567_c0_g3	8.96	7.48e-05	Squamosa promoter-binding-like protein 12 [Cajanus cajan]
TRINITY_DN17050_c0_g1	-11.31	7.68e-05	-
TRINITY_DN14010_c0_g3	-11.22	8.32e-05	-
TRINITY_DN18476_c0_g1	2.62	8.65e-05	PREDICTED: uncharacterized membrane protein C776.05 isoform X3 [Juglans regia]
TRINITY_DN17638_c0_g4	-2.83	8.65e-05	glucomannan 4-beta-mannosyltransferase 9 [Medicago truncatula]
TRINITY_DN16671_c1_g1	2.59	8.65e-05	stachyose synthase [Medicago truncatula]
TRINITY_DN18048_c0_g3	-5.27	8.7e-05	-
TRINITY_DN4696_c0_g2	-7.52	9.07e-05	putative bark agglutinin LECRPA3 [Medicago truncatula]
TRINITY_DN8760_c0_g1	11.51	0.000105	zinc finger BED domain-containing protein RICESLEEPER 2-like [Medicago truncatula]
TRINITY_DN17503_c2_g2	7.96	0.000106	GDSL esterase/lipase CPRD49 [Medicago truncatula]
TRINITY_DN14753_c1_g1	6.57	0.000111	-
TRINITY_DN15705_c0_g1	8.59	0.00012	uncharacterized protein LOC11425908 [Medicago truncatula]
TRINITY_DN8959_c0_g1	10.35	0.000139	albumin-1 [Medicago truncatula]
TRINITY_DN18853_c0_g1	-2.21	0.000139	DUF674 family protein [Medicago truncatula]
TRINITY_DN18186_c2_g4	3.8	0.000164	kunitz-type trypsin inhibitor-like 1 protein [Medicago truncatula]
TRINITY_DN10670_c0_g2	9.68	0.000173	-
TRINITY_DN18516_c0_g4	2.93	0.000175	linoleate 9S-lipoxygenase [Medicago truncatula]
TRINITY_DN18098_c1_g7	3.21	0.000196	putative transcription factor AP2-EREBP family [Medicago truncatula]
TRINITY_DN8951_c0_g2	10.87	0.000208	cytochrome oxidase subunit 2 (mitochondrion) [Isoetes engelmannii]
TRINITY_DN17062_c0_g1	-3.14	0.00021	polygalacturonase inhibitor 1-like [Medicago truncatula]
TRINITY_DN18626_c0_g2	-6.11	0.00021	transcription initiation factor TFIID subunit 4b [Medicago truncatula]
TRINITY_DN19031_c0_g1	8.32	0.000213	probable fructokinase-5 [Medicago truncatula]
TRINITY_DN15545_c1_g1	-8.22	0.000221	-
TRINITY_DN356_c0_g1	10.89	0.000231	Reverse transcriptase (RNA-dependent DNA polymerase), putative [Medicago truncatula]
TRINITY_DN14651_c0_g5	-10.85	0.000232	disease resistance protein (TIR-NBS-LRR class) [Medicago truncatula]
TRINITY_DN13422_c0_g3	4.98	0.000244	hypothetical protein VIGAN_UM118800 [Vigna angularis var. angularis]
TRINITY_DN18460_c0_g2	-3.87	0.000244	uncharacterized protein LOC11438861 [Medicago truncatula]
TRINITY_DN3297_c0_g1	10.77	0.00025	H(+)-transporting ATPase F0 subunit 6 (mitochondrion) [Auxenochlorella protothecoides]
TRINITY_DN15893_c0_g2	10.17	0.00025	reticulocalbin-2 [Medicago truncatula]
TRINITY_DN15002_c0_g4	-2.03	0.00025	putative UDP-N-acetylglucosamine pyrophosphorylase, partial [Medicago sativa]
TRINITY_DN10206_c0_g3	-3.43	0.000273	probable glycosyltransferase At5g20260 [Medicago truncatula]
TRINITY_DN17736_c1_g1	-4.83	0.000277	-
TRINITY_DN8648_c0_g1	8.34	0.000277	protein FAR1-related sequence 5-like [Trifolium pratense]
TRINITY_DN18735_c1_g1	4.07	0.000279	-
TRINITY_DN14832_c0_g3	9.2	0.000281	-
TRINITY_DN15220_c0_g1	5.7	0.000307	hypothetical protein TSUD_254840 [Trifolium subterraneum]
TRINITY_DN11477_c0_g1	3.92	0.000309	defensin [Medicago truncatula]
TRINITY_DN14360_c2_g4	-8.98	0.000324	uncharacterized protein LOC25487177 [Medicago truncatula]
TRINITY_DN17683_c0_g3	8.73	0.00034	-
TRINITY_DN13280_c0_g1	-6.74	0.000357	-
TRINITY_DN14319_c0_g4	2.61	0.000357	hypothetical protein TanjilG_21878 [Lupinus angustifolius]
TRINITY_DN1195_c0_g1	8.31	0.000357	-
TRINITY_DN14908_c0_g7	-8.41	0.000357	NADH kinase [Cicer arietinum]
TRINITY_DN11654_c0_g1	-1.94	0.000398	glucomannan 4-beta-mannosyltransferase 9 [Medicago truncatula]
TRINITY_DN17138_c1_g1	9.16	0.000404	-
TRINITY_DN13251_c0_g7	8.67	0.000419	protein CHUP1, chloroplastic-like [Cicer arietinum]
TRINITY_DN17962_c2_g1	-9.39	0.000468	-
TRINITY_DN16568_c0_g1	10.65	0.00048	-
TRINITY_DN13492_c1_g1	5.35	0.000504	-
TRINITY_DN11884_c2_g3	8.73	0.000506	-
TRINITY_DN15035_c0_g1	7.63	0.000532	hypothetical protein TSUD_341150 [Trifolium subterraneum]
TRINITY_DN16940_c0_g1	7.99	0.000557	uncharacterized protein LOC112422068 [Medicago truncatula]
TRINITY_DN18052_c0_g3	2.91	0.000577	cyanogenic beta-glucosidase, putative [Medicago truncatula]
TRINITY_DN15009_c0_g1	-2.26	0.000577	probable copper-transporting ATPase HMA5 isoform X1 [Medicago truncatula]
TRINITY_DN14555_c0_g1	4.78	0.000584	-
TRINITY_DN14694_c0_g3	-1.76	0.000588	putative vacuolar protein sorting-associated protein Ist1 [Medicago truncatula]
TRINITY_DN17042_c1_g1	3.42	0.00059	-
TRINITY_DN14108_c0_g4	-3.22	0.000591	UDP-glycosyltransferase 1 [Medicago truncatula]
TRINITY_DN11592_c0_g2	10.38	0.000593	transmembrane protein, putative [Medicago truncatula]
TRINITY_DN17507_c0_g2	4.51	0.000595	-
TRINITY_DN16522_c0_g6	-8.31	0.000602	-
TRINITY_DN18456_c1_g5	9.19	0.000657	hypothetical protein TSUD_90970, partial [Trifolium subterraneum]
TRINITY_DN17201_c0_g5	-6.51	0.000702	-
TRINITY_DN18488_c0_g2	-8.8	0.000733	hypothetical protein L195_g031334 [Trifolium pratense]
TRINITY_DN18037_c0_g2	5.7	0.000754	-
TRINITY_DN18687_c1_g3	-1.95	0.000762	histidine kinase 1 [Medicago truncatula]
TRINITY_DN13233_c0_g2	-10.07	0.000762	uncharacterized protein LOC11419651 [Medicago truncatula]
TRINITY_DN14191_c0_g3	-6.03	0.000809	agamous-like MADS-box protein AGL18 [Medicago truncatula]
TRINITY_DN18084_c0_g1	3.96	0.000821	zinc finger BED domain-containing protein RICESLEEPER 2-like isoform X1 [Cicer arietinum]
TRINITY_DN13979_c1_g5	6.63	0.000827	-
TRINITY_DN18772_c2_g3	8.32	0.000827	hypothetical protein TSUD_34030 [Trifolium subterraneum]
TRINITY_DN15737_c0_g3	-8.84	0.000827	mitochondrial inner membrane protein OXA1 [Medicago truncatula]
TRINITY_DN15439_c0_g7	4.35	0.000827	protein PMR5 [Medicago truncatula]
TRINITY_DN17924_c0_g1	-6.29	0.000869	PREDICTED: LOW QUALITY PROTEIN: DNA polymerase-like [Theobroma cacao]
TRINITY_DN8027_c0_g2	-6.25	0.000871	hypothetical protein TSUD_357950 [Trifolium subterraneum]
TRINITY_DN18918_c1_g3	2.32	0.000896	hypothetical protein TanjilG_29985 [Lupinus angustifolius]
TRINITY_DN16024_c0_g1	-5.99	0.000919	-
TRINITY_DN14790_c0_g4	7.75	0.000934	-
TRINITY_DN16298_c0_g3	7.42	0.00096	-
TRINITY_DN15601_c0_g2	-2.88	0.000961	DNA-directed RNA polymerase II subunit RPB2 [Quercus suber]
TRINITY_DN18918_c1_g1	2.33	0.00101	senescence-associated protein, putative [Medicago truncatula]
TRINITY_DN7581_c0_g2	9.96	0.00103	cytochrome b (mitochondrion) [Ostreococcus tauri]
TRINITY_DN2116_c0_g1	9.95	0.00104	albumin-1 [Medicago truncatula]
TRINITY_DN16340_c1_g2	-1.72	0.00108	phospho-2-dehydro-3-deoxyheptonate aldolase 1, chloroplastic [Medicago truncatula]
TRINITY_DN17886_c0_g3	10.13	0.00111	-
TRINITY_DN15264_c1_g1	-3.11	0.00122	-
TRINITY_DN10670_c0_g6	9.89	0.00129	-
TRINITY_DN13666_c2_g1	-7.64	0.00129	-
TRINITY_DN6905_c0_g1	7.87	0.00131	-
TRINITY_DN11683_c0_g1	7.75	0.00131	cathepsin L1 [Medicago truncatula]
TRINITY_DN15563_c0_g1	2.76	0.00131	hypothetical protein D0Y65_026221 [Glycine soja]
TRINITY_DN17689_c0_g1	2.33	0.00132	hypothetical protein GLYMA_13G017100 [Glycine max]
TRINITY_DN17851_c1_g3	3.88	0.00132	hypothetical protein MTR_5g067940 [Medicago truncatula]
TRINITY_DN3988_c0_g1	8.13	0.00132	-
TRINITY_DN18755_c0_g3	10.05	0.00132	-
TRINITY_DN17063_c0_g1	2.89	0.00132	UDP-glucose flavonoid 3-O-glucosyltransferase 7 [Medicago truncatula]
TRINITY_DN15673_c1_g4	5.65	0.00132	-
TRINITY_DN15705_c0_g3	7.84	0.00133	replication factor-A carboxy-terminal domain protein [Medicago truncatula]
TRINITY_DN15937_c0_g1	-2.63	0.00134	ACT domain-containing protein ACR8 [Medicago truncatula]
TRINITY_DN17383_c2_g1	-7.59	0.00134	putative SAWADEE domain-containing protein [Medicago truncatula]
TRINITY_DN6693_c0_g1	6.7	0.00134	ervatamin-B [Medicago truncatula]
TRINITY_DN18002_c1_g6	4.35	0.00144	hypothetical protein MTR_8g070960 [Medicago truncatula]
TRINITY_DN16388_c1_g5	-3.17	0.00147	PH, RCC1 and FYVE domains-containing protein 1 [Medicago truncatula]
TRINITY_DN18705_c0_g1	2.38	0.00148	hypothetical protein GLYMA_U007300 [Glycine max]
TRINITY_DN14062_c0_g4	-9.71	0.00151	GDSL-like lipase/acylhydrolase [Medicago truncatula]
TRINITY_DN13789_c1_g3	6.02	0.00152	-
TRINITY_DN14313_c0_g4	-6.27	0.00153	hypothetical protein TanjilG_19825 [Lupinus angustifolius]
TRINITY_DN14882_c0_g5	-1.75	0.00155	vacuolar-processing enzyme [Medicago truncatula]
TRINITY_DN10670_c0_g3	9.74	0.00155	-
TRINITY_DN17816_c2_g3	9.74	0.00157	putative LRR receptor-like serine/threonine-protein kinase At1g67720 family [Cajanus cajan]
TRINITY_DN17528_c0_g5	2.65	0.00165	linoleate 9S-lipoxygenase [Medicago truncatula]
TRINITY_DN18764_c0_g2	2.4	0.00177	ribosome maturation protein SBDS [Cicer arietinum]
TRINITY_DN18407_c1_g1	-8.07	0.00181	endoglucanase 2 [Medicago truncatula]
TRINITY_DN13869_c0_g2	-5.58	0.00182	-
TRINITY_DN11037_c0_g2	9.63	0.00182	-
TRINITY_DN17965_c0_g3	-1.75	0.00182	hypothetical protein L195_g049697, partial [Trifolium pratense]
TRINITY_DN17670_c1_g4	-5.65	0.00194	Translation factor [Medicago truncatula]
TRINITY_DN11733_c0_g3	5.44	0.002	-
TRINITY_DN16061_c1_g1	5.61	0.00202	stem 28 kDa glycoprotein [Medicago truncatula]
TRINITY_DN18392_c0_g7	4.7	0.00206	-
TRINITY_DN16050_c0_g2	9.6	0.00206	putative nucleic acid-binding protein [Medicago truncatula]
TRINITY_DN17854_c0_g8	-5.46	0.00208	-
TRINITY_DN17654_c0_g2	6.05	0.00212	hypothetical protein TSUD_220720 [Trifolium subterraneum]
TRINITY_DN15664_c2_g1	3.64	0.00218	-
TRINITY_DN10730_c0_g2	-5.21	0.00222	-
TRINITY_DN9122_c0_g1	3.37	0.00227	glucose-6-phosphate/phosphate translocator 2, chloroplastic [Medicago truncatula]
TRINITY_DN18451_c0_g3	4.56	0.00228	cystinosin homolog [Medicago truncatula]
TRINITY_DN18396_c1_g4	5.61	0.00228	PIF1-like helicase [Medicago truncatula]
TRINITY_DN11865_c0_g1	3.43	0.00228	snakin-2 [Medicago truncatula]
TRINITY_DN18429_c0_g4	8.18	0.00233	putative xenobiotic-transporting ATPase [Medicago truncatula]
TRINITY_DN16895_c0_g1	-5.7	0.00253	MYB-related protein 308-like protein [Trifolium pratense]
TRINITY_DN11447_c0_g2	9.39	0.00253	-
TRINITY_DN8371_c0_g1	-9.47	0.00256	-
TRINITY_DN13607_c0_g1	-4.89	0.0026	-
TRINITY_DN11347_c0_g1	-6.53	0.00262	putative nucleic acid-binding protein [Medicago truncatula]
TRINITY_DN17873_c1_g4	-8.11	0.00262	Ulp1 protease family, carboxy-terminal domain protein [Medicago truncatula]
TRINITY_DN15080_c0_g5	8.1	0.00267	proteasome subunit alpha type-3 [Cicer arietinum]
TRINITY_DN10303_c0_g1	7.68	0.00268	protein SIEVE ELEMENT OCCLUSION B [Medicago truncatula]
TRINITY_DN12604_c0_g5	-7.01	0.00271	hypothetical protein MtrunA17_Chr2g0331731 [Medicago truncatula]
TRINITY_DN10801_c0_g1	-1.99	0.00273	protein SPEAR1 [Medicago truncatula]
TRINITY_DN12475_c0_g1	6.56	0.00273	cytochrome P450 88D3 [Medicago truncatula]
TRINITY_DN8715_c0_g1	-4.64	0.00273	Glycoside hydrolase, family 17 [Medicago truncatula]
TRINITY_DN9408_c0_g2	8.31	0.00273	Sterol desaturase [Medicago truncatula]
TRINITY_DN16771_c0_g3	1.8	0.00273	hypothetical protein LSAT_4X50261 [Lactuca sativa]
TRINITY_DN12277_c1_g7	8.35	0.00277	-
TRINITY_DN17080_c0_g3	6.31	0.00279	Polynucleotidyl transferase, Ribonuclease H fold [Medicago truncatula]
TRINITY_DN17682_c0_g4	-8.13	0.00284	hypothetical protein TSUD_08930 [Trifolium subterraneum]
TRINITY_DN15744_c0_g1	-1.91	0.00284	ABC transporter B family member 26, chloroplastic isoform X1 [Medicago truncatula]
TRINITY_DN18346_c1_g6	10.03	0.00289	-
TRINITY_DN12410_c0_g3	7.36	0.00291	albumin-1 [Medicago truncatula]
TRINITY_DN464_c0_g1	-7.94	0.00291	-
TRINITY_DN15863_c0_g3	1.89	0.00291	hypothetical protein CR513_00079, partial [Mucuna pruriens]
TRINITY_DN16304_c1_g3	-5.6	0.00291	serine/threonine-protein kinase CDG1 isoform X1 [Medicago truncatula]
TRINITY_DN17900_c0_g1	3.53	0.00295	BAG family molecular chaperone regulator 6 [Medicago truncatula]
TRINITY_DN11447_c0_g1	9.25	0.00295	-
TRINITY_DN16147_c0_g7	-2.94	0.00298	MLP-like protein 328 [Medicago truncatula]
TRINITY_DN15113_c1_g2	3.24	0.00298	hypothetical protein MTR_6g009455 [Medicago truncatula]
TRINITY_DN18258_c0_g5	-2.92	0.00302	uncharacterized protein LOC25487584 [Medicago truncatula]
TRINITY_DN16768_c1_g4	6.15	0.00309	-
TRINITY_DN18991_c1_g9	7.46	0.0031	uncharacterized protein At1g76070 [Medicago truncatula]
TRINITY_DN16810_c0_g1	-8.6	0.00313	-
TRINITY_DN17162_c0_g3	-7.76	0.00315	-
TRINITY_DN13246_c1_g4	2.73	0.00315	putative benzyl alcohol O-benzoyltransferase [Medicago truncatula]
TRINITY_DN7531_c0_g1	9.21	0.00315	-
TRINITY_DN18448_c1_g1	2.38	0.00315	ATP synthase F1, alpha subunit [Medicago truncatula]
TRINITY_DN13385_c0_g4	-2.9	0.00315	protein SRG1 isoform X2 [Medicago truncatula]
TRINITY_DN6677_c0_g1	-9.2	0.00317	hypothetical protein TSUD_305510 [Trifolium subterraneum]
TRINITY_DN15778_c0_g4	1.97	0.00331	transmembrane protein, putative [Medicago truncatula]
TRINITY_DN17399_c1_g5	3.59	0.00331	hypothetical protein MtrunA17_Chr3g0099301 [Medicago truncatula]
TRINITY_DN17790_c0_g1	6.32	0.00334	-
TRINITY_DN705_c0_g1	-7.77	0.00334	uncharacterized protein LOC112418674 [Medicago truncatula]
TRINITY_DN6704_c0_g1	5.12	0.00334	hypothetical protein MtrunA17_Chr2g0293051 [Medicago truncatula]
TRINITY_DN14651_c0_g3	-5.17	0.00341	putative winged helix-turn-helix DNA-binding domain-containing protein [Medicago truncatula]
TRINITY_DN33_c0_g1	9.12	0.00341	NADH dehydrogenase subunit 4 [Chaetosphaeridium globosum]
TRINITY_DN16557_c0_g1	-3.42	0.0035	hypothetical protein TSUD_292440 [Trifolium subterraneum]
TRINITY_DN18104_c1_g4	-9.2	0.0035	uncharacterized protein LOC112420237 [Medicago truncatula]
TRINITY_DN18573_c0_g1	9.28	0.0035	-
TRINITY_DN11853_c1_g7	2.84	0.00357	protein TAR1-like [Cicer arietinum]
TRINITY_DN13598_c1_g2	6.25	0.00358	RNA-dependent RNA polymerase 6 [Cicer arietinum]
TRINITY_DN61_c0_g1	9.17	0.00361	-
TRINITY_DN11290_c0_g1	4.18	0.00376	-
TRINITY_DN16483_c0_g1	2.02	0.00378	inorganic pyrophosphatase 2 [Medicago truncatula]
TRINITY_DN18859_c0_g3	7.15	0.0039	-
TRINITY_DN18217_c0_g5	9.11	0.00391	LRR receptor-like kinase plant [Medicago truncatula]
TRINITY_DN11826_c0_g2	2.27	0.00394	uncharacterized protein LOC114171562 [Vigna unguiculata]
TRINITY_DN15427_c0_g4	6.67	0.00404	(-)-isopiperitenol/(-)-carveol dehydrogenase, mitochondrial [Medicago truncatula]
TRINITY_DN18334_c0_g4	-8.92	0.00407	hypothetical protein MTR_1g009820 [Medicago truncatula]
TRINITY_DN17128_c0_g2	4.98	0.00417	hypothetical protein TSUD_345710 [Trifolium subterraneum]
TRINITY_DN11783_c0_g1	2.65	0.00418	Kunitz type trypsin inhibitor / Alpha-fucosidase [Medicago truncatula]
TRINITY_DN14153_c0_g5	2.67	0.0042	hypothetical protein D0Y65_026221 [Glycine soja]
TRINITY_DN1319_c0_g1	6.47	0.0045	hypothetical protein CDL15_Pgr021531 [Punica granatum]
TRINITY_DN18985_c2_g3	3.87	0.0045	monothiol glutaredoxin-S2 [Medicago truncatula]
TRINITY_DN16953_c0_g5	-4.81	0.0045	putative RNA-directed DNA polymerase [Medicago truncatula]
TRINITY_DN10642_c0_g3	-3.31	0.0045	hypothetical protein MtrunA17_Chr5g0411281 [Medicago truncatula]
TRINITY_DN16698_c1_g2	-7.16	0.0045	wall-associated receptor kinase-like 1 [Medicago truncatula]
TRINITY_DN8303_c0_g1	9.05	0.0045	-
TRINITY_DN12742_c0_g1	-7.24	0.00456	uncharacterized protein LOC101488650 [Cicer arietinum]
TRINITY_DN9819_c1_g5	8.91	0.00457	unknown [Zea mays]
TRINITY_DN10960_c1_g5	-7.1	0.00457	hypothetical protein TSUD_338030 [Trifolium subterraneum]
TRINITY_DN11222_c0_g4	8.9	0.00468	40S ribosomal protein S2-like [Physcomitrella patens]
TRINITY_DN17883_c1_g2	4.33	0.00468	bark storage protein A [Medicago truncatula]
TRINITY_DN11996_c1_g9	5.25	0.00468	-
TRINITY_DN18417_c0_g2	4.28	0.00471	-
TRINITY_DN17015_c0_g1	-2.27	0.00472	protein DETOXIFICATION 29 [Medicago truncatula]
TRINITY_DN18620_c0_g1	-9.15	0.00472	hypothetical protein MtrunA17_Chr3g0120641 [Medicago truncatula]
TRINITY_DN16190_c0_g5	-8.98	0.00472	unknown [Medicago truncatula]
TRINITY_DN6692_c0_g1	8.98	0.00472	uncharacterized protein LOC112418486 [Medicago truncatula]
TRINITY_DN12277_c1_g2	9.18	0.00472	-
TRINITY_DN440_c0_g1	9.22	0.00476	-
TRINITY_DN14119_c0_g3	1.81	0.00477	protein PLASTID REDOX INSENSITIVE 2, chloroplastic [Medicago truncatula]
TRINITY_DN14983_c0_g5	7.66	0.00477	hypothetical protein MtrunA17_Chr2g0299531 [Medicago truncatula]
TRINITY_DN16298_c0_g1	3.6	0.00477	-
TRINITY_DN10987_c0_g1	7	0.0048	uncharacterized protein LOC112420368 [Medicago truncatula]
TRINITY_DN18603_c1_g2	1.65	0.00483	hypothetical protein CR513_02839, partial [Mucuna pruriens]
TRINITY_DN17760_c0_g5	8.95	0.00484	hypothetical protein MTR_1g041545 [Medicago truncatula]
TRINITY_DN13223_c0_g1	3.56	0.00484	protein FAR1-RELATED SEQUENCE 5-like [Medicago truncatula]
TRINITY_DN16084_c0_g1	4.53	0.005	-
TRINITY_DN11104_c0_g2	-4.41	0.005	isoliquiritigenin 2'-O-methyltransferase [Medicago truncatula]
TRINITY_DN16635_c1_g3	7.18	0.00511	hypothetical protein Ahy_B09g094594 isoform A [Arachis hypogaea]
TRINITY_DN11375_c0_g1	-1.58	0.00531	leucine-rich repeat extensin-like protein 4 [Medicago truncatula]
TRINITY_DN15373_c0_g2	2.68	0.00536	-
TRINITY_DN18668_c0_g4	2.45	0.00545	hypothetical protein RF2 (plastid) [Viburnum cylindricum]
TRINITY_DN16145_c1_g5	-5.5	0.00554	isoflavone reductase-like protein [Medicago truncatula]
TRINITY_DN17328_c1_g7	8.81	0.00554	-
TRINITY_DN18325_c0_g3	3.49	0.0056	ATP-dependent DNA helicase Q-like 4A [Medicago truncatula]
TRINITY_DN18359_c0_g2	1.53	0.00569	peptidyl-prolyl cis-trans isomerase-like protein [Medicago truncatula]
TRINITY_DN18342_c1_g8	5.86	0.00578	-
TRINITY_DN15725_c0_g3	1.64	0.00587	hypothetical protein CR513_02836, partial [Mucuna pruriens]
TRINITY_DN12571_c0_g1	1.72	0.00591	ribonuclease 3-like protein 2 [Medicago truncatula]
TRINITY_DN18655_c0_g1	4.5	0.00591	hypothetical protein CR513_31204, partial [Mucuna pruriens]
TRINITY_DN13168_c0_g1	2.14	0.00607	-
TRINITY_DN9054_c0_g2	5.63	0.00609	hypothetical protein MtrunA17_Chr1g0204311 [Medicago truncatula]
TRINITY_DN13624_c0_g3	3.55	0.0061	-
TRINITY_DN13590_c1_g1	6.14	0.00619	Heat shock cognate 70 kDa protein [Vitis vinifera]
TRINITY_DN14872_c1_g3	3.36	0.00632	phospholipase A1-Igamma2, chloroplastic [Medicago truncatula]
TRINITY_DN14403_c0_g2	5.31	0.00638	F-box protein [Trifolium pratense]
TRINITY_DN18579_c1_g2	2.01	0.00638	hypothetical protein MtrunA17_Chr6g0457521 [Medicago truncatula]
TRINITY_DN8091_c0_g1	6.23	0.00638	PREDICTED: chitinase 1-like [Elaeis guineensis]
TRINITY_DN11856_c0_g1	8.78	0.00638	-
TRINITY_DN15563_c0_g2	2.6	0.00639	hypothetical protein MTR_5g089380 [Medicago truncatula]
TRINITY_DN18175_c4_g4	-2.49	0.00664	cytochrome P450 71A26 [Medicago truncatula]
TRINITY_DN18392_c0_g4	8.88	0.00669	hypothetical protein MtrDRAFT_AC158464g1v2 [Medicago truncatula]
TRINITY_DN12119_c0_g2	8.87	0.00678	hypothetical protein MTR_2g102223 [Medicago truncatula]
TRINITY_DN15863_c0_g2	1.61	0.00678	hypothetical protein MtrunA17_Chr0c03g0489951 [Medicago truncatula]
TRINITY_DN13083_c0_g4	-1.5	0.00696	cellulose synthase A catalytic subunit 8 [UDP-forming] [Medicago truncatula]
TRINITY_DN4705_c0_g1	-4.4	0.00696	-
TRINITY_DN14054_c0_g2	-2.18	0.00699	cold and drought-regulated protein CORA [Medicago truncatula]
TRINITY_DN13880_c0_g9	-6.9	0.00704	Transposon Ty3-G Gag-Pol polyprotein [Cajanus cajan]
TRINITY_DN17595_c1_g4	4.03	0.00705	-
TRINITY_DN7947_c0_g1	8.75	0.00713	-
TRINITY_DN18301_c0_g1	-3.84	0.00723	NB-ARC domain disease resistance protein, putative [Medicago truncatula]
TRINITY_DN9391_c0_g1	-4.16	0.00724	E3 ubiquitin-protein ligase RHF2A [Medicago truncatula]
TRINITY_DN18272_c2_g1	2.13	0.00726	hypothetical protein MtrunA17_Chr7g0270261 [Medicago truncatula]
TRINITY_DN15375_c0_g1	-2.04	0.00727	rust resistance kinase Lr10 [Medicago truncatula]
TRINITY_DN17751_c0_g8	8.69	0.00727	putative histone acetyltransferase chromatin regulator PHD family [Medicago truncatula]
TRINITY_DN8994_c0_g1	-5.69	0.00731	transcription factor ICE1 [Medicago truncatula]
TRINITY_DN8274_c0_g1	-3.96	0.00735	MADS-box transcription factor family protein [Medicago truncatula]
TRINITY_DN13894_c0_g5	1.63	0.00735	uncharacterized protein LOC11429208 isoform X1 [Medicago truncatula]
TRINITY_DN12998_c0_g2	-1.97	0.00735	glucomannan 4-beta-mannosyltransferase 9 [Medicago truncatula]
TRINITY_DN17438_c2_g2	-6.06	0.00735	-
TRINITY_DN12187_c0_g4	-1.71	0.00735	rhicadhesin receptor [Medicago truncatula]
TRINITY_DN14852_c1_g3	1.63	0.00737	hypothetical protein GOBAR_DD10890 [Gossypium barbadense]
TRINITY_DN18970_c1_g2	3.1	0.00738	TMV resistance protein N [Medicago truncatula]
TRINITY_DN17030_c0_g6	-8.6	0.00742	-
TRINITY_DN15369_c0_g2	-8.58	0.00757	cytochrome C biogenesis protein ccsA [Medicago truncatula]
TRINITY_DN13864_c0_g4	2.76	0.00785	-
TRINITY_DN18299_c1_g1	-3.97	0.00797	-
TRINITY_DN13395_c0_g6	8.6	0.00813	-
TRINITY_DN17593_c0_g1	1.45	0.00825	Fe-superoxide dismutase precursor [Medicago sativa]
TRINITY_DN550_c0_g1	8.82	0.00849	-
TRINITY_DN7434_c0_g2	8.54	0.00849	predicted protein [Hordeum vulgare subsp. vulgare]
TRINITY_DN14096_c0_g5	-7.03	0.00854	-
TRINITY_DN7029_c0_g1	-3.58	0.00865	transmembrane protein, putative [Medicago truncatula]
TRINITY_DN12006_c1_g6	-3.33	0.00869	5'-nucleotidase surE-like protein [Trifolium pratense]
TRINITY_DN14096_c0_g7	-8.41	0.00894	DNA replication complex GINS protein PSF2-like [Cicer arietinum]
TRINITY_DN10823_c0_g1	-2	0.00904	dirigent protein 23 [Medicago truncatula]
TRINITY_DN1355_c0_g1	5.93	0.00912	-
TRINITY_DN8404_c0_g1	8.49	0.00914	component of cytosolic 80S ribosome and 60S large subunit [Volvox carteri f. nagariensis]
TRINITY_DN11388_c0_g1	4.04	0.00928	basic 7S globulin [Medicago truncatula]
TRINITY_DN18516_c0_g3	2.49	0.00945	linoleate 9S-lipoxygenase 1 [Medicago truncatula]
TRINITY_DN13357_c0_g3	-5.1	0.00949	-
TRINITY_DN14852_c1_g4	1.56	0.00949	BnaCnng12640D [Brassica napus]
TRINITY_DN474_c0_g1	8.48	0.00965	NADH-plastoquinone oxidoreductase subunit 2 (chloroplast) [Tetraplodon fuegianus]
TRINITY_DN17690_c1_g3	-4.74	0.00977	PREDICTED: putative nuclease HARBI1 isoform X1 [Eucalyptus grandis]
TRINITY_DN9721_c1_g5	4.61	0.00979	-
TRINITY_DN15252_c0_g1	3.13	0.00984	nucleotide pyrophosphatase/phosphodiesterase [Medicago truncatula]
TRINITY_DN17102_c0_g2	2.09	0.00984	-
TRINITY_DN15420_c0_g3	-7.71	0.00986	-
TRINITY_DN16363_c0_g6	8.58	0.0104	hypothetical protein TSUD_96030 [Trifolium subterraneum]
TRINITY_DN6887_c0_g1	8.44	0.0105	ribonuclease H, partial [Trifolium pratense]
TRINITY_DN13784_c1_g6	2.36	0.0105	maturase K (chloroplast) [Medicago ruthenica]
TRINITY_DN8461_c0_g1	7.35	0.0105	uncharacterized protein LOC112420870 [Medicago truncatula]
TRINITY_DN14145_c0_g1	2.24	0.0106	unknown [Medicago truncatula]
TRINITY_DN13228_c0_g1	4.26	0.0106	retrovirus-related Pol polyprotein from transposon TNT 1-94 [Trifolium pratense]
TRINITY_DN6499_c0_g1	4.8	0.0108	-
TRINITY_DN17712_c1_g6	4.21	0.0108	polygalacturonase inhibitor 2-like protein [Trifolium pratense]
TRINITY_DN9351_c0_g2	8.58	0.0108	60S ribosomal export protein NMD3 [Medicago truncatula]
TRINITY_DN16669_c0_g2	-1.61	0.0108	laccase-17 [Medicago truncatula]
TRINITY_DN1267_c0_g1	-7.2	0.0109	hypothetical protein MTR_7g113290 [Medicago truncatula]
TRINITY_DN12491_c0_g4	-2.17	0.0111	protein ESKIMO 1 [Medicago truncatula]
TRINITY_DN10290_c0_g1	7.99	0.0111	heme-binding-like protein At3g10130, chloroplastic [Medicago truncatula]
TRINITY_DN9541_c0_g1	7.1	0.0111	component of cytosolic 80S ribosome and 40S small subunit [Volvox carteri f. nagariensis]
TRINITY_DN16197_c0_g7	1.78	0.0112	butyrate--CoA ligase AAE11, peroxisomal [Medicago truncatula]
TRINITY_DN18319_c0_g5	-8.26	0.0113	-
TRINITY_DN18266_c0_g2	2.12	0.0114	cytochrome P450 monooxygenase [Medicago truncatula]
TRINITY_DN15795_c0_g5	5.17	0.0115	-
TRINITY_DN14760_c0_g1	-1.48	0.0116	laccase-5 [Medicago truncatula]
TRINITY_DN12900_c1_g4	1.65	0.0116	putative xyloglucan:xyloglucosyl transferase, Xyloglucan-specific endo-beta-1,4-glucanase [Medicago truncatula]
TRINITY_DN15576_c1_g1	5.29	0.0116	12-oxophytodienoate reductase 3 [Medicago truncatula]
TRINITY_DN18530_c1_g1	4.46	0.0117	10-hydroxygeraniol oxidoreductase [Codonopsis lanceolata]
TRINITY_DN17010_c0_g2	1.73	0.0117	ATPase subunit 1 (mitochondrion) [Medicago truncatula]
TRINITY_DN8951_c0_g1	6.95	0.0118	-
TRINITY_DN13363_c1_g4	7.89	0.0121	hypothetical protein MTR_2g022230 [Medicago truncatula]
TRINITY_DN8717_c0_g1	6.15	0.0122	PREDICTED: aminopeptidase Ey-like [Pyrus x bretschneideri]
TRINITY_DN13190_c0_g5	5.15	0.0124	-
TRINITY_DN5821_c0_g1	-8.41	0.0124	uncharacterized protein LOC112419965 [Medicago truncatula]
TRINITY_DN8032_c0_g1	8.34	0.0126	hypothetical protein MtrunA17_Chr4g0037961 [Medicago truncatula]
TRINITY_DN17386_c0_g2	3.48	0.0126	ribonuclease H [Trifolium pratense]
TRINITY_DN18324_c2_g1	4.75	0.0126	-
TRINITY_DN7436_c0_g3	8.21	0.0127	NADH dehydrogenase subunit 1 (mitochondrion) [Entransia fimbriata]
TRINITY_DN17046_c0_g2	-1.54	0.0127	11-oxo-beta-amyrin 30-oxidase [Medicago truncatula]
TRINITY_DN1344_c0_g1	5.13	0.0128	putative winged helix-turn-helix DNA-binding domain, leucine-rich repeat domain, L [Medicago truncatula]
TRINITY_DN16234_c2_g1	8.3	0.0128	-
TRINITY_DN15241_c1_g3	2.02	0.0128	transcription factor SCREAM2 isoform X2 [Medicago truncatula]
TRINITY_DN11119_c0_g1	1.69	0.013	putative methyltransferase DDB_G0268948 [Medicago truncatula]
TRINITY_DN17219_c0_g5	-8.25	0.0132	endonuclease/exonuclease/phosphatase family protein, partial [Medicago truncatula]
TRINITY_DN11751_c0_g4	2.81	0.0133	zinc-finger homeodomain protein 1 [Medicago truncatula]
TRINITY_DN8466_c0_g1	6.94	0.0135	-
TRINITY_DN16710_c0_g1	3.34	0.0135	-
TRINITY_DN8848_c0_g1	6.82	0.0135	uncharacterized protein LOC25495687 [Medicago truncatula]
TRINITY_DN16642_c0_g7	-3.65	0.0135	-
TRINITY_DN12280_c0_g1	2.82	0.0135	1-aminocyclopropane-1-carboxylate oxidase homolog 1 isoform X1 [Medicago truncatula]
TRINITY_DN17332_c1_g6	2.37	0.0135	cytochrome P450 714A1 [Medicago truncatula]
TRINITY_DN7791_c0_g3	8.15	0.0135	60S ribosomal protein L13a-4 [Vigna radiata var. radiata]
TRINITY_DN13054_c0_g2	-2.07	0.0137	-
TRINITY_DN7952_c0_g1	8.14	0.0138	-
TRINITY_DN14236_c0_g4	2.56	0.0138	putative flavonol 7-O-beta-glucosyltransferase [Medicago truncatula]
TRINITY_DN9375_c0_g1	-8.09	0.0139	retrofit protein [Trifolium pratense]
TRINITY_DN15695_c0_g3	-3.89	0.014	-
TRINITY_DN16581_c0_g1	6.4	0.014	-
TRINITY_DN18966_c2_g2	-3.04	0.0141	putative TIR domain, winged helix-turn-helix DNA-binding domain-containing protein [Medicago truncatula]
TRINITY_DN14572_c0_g4	-2.82	0.0143	universal stress protein PHOS32 [Medicago truncatula]
TRINITY_DN18191_c0_g2	-3.76	0.0144	-
TRINITY_DN16353_c0_g2	-3.84	0.0144	-
TRINITY_DN8068_c0_g1	4.16	0.0146	hypothetical protein TSUD_378670 [Trifolium subterraneum]
TRINITY_DN3151_c0_g2	8.42	0.0147	PREDICTED: uncharacterized protein LOC109340130 isoform X1 [Lupinus angustifolius]
TRINITY_DN15188_c0_g6	-5.69	0.0147	hypothetical protein MtrunA17_Chr2g0293501 [Medicago truncatula]
TRINITY_DN12751_c1_g1	2.73	0.0149	beta-amyrin 24-hydroxylase [Medicago truncatula]
TRINITY_DN8001_c0_g1	4.85	0.0149	stilbene synthase 4 [Medicago truncatula]
TRINITY_DN9591_c0_g1	5.83	0.0149	lectin [Medicago sativa]
TRINITY_DN9153_c0_g1	8.13	0.015	putative anthocyanidin 3-O-glucosyltransferase [Medicago truncatula]
TRINITY_DN17201_c0_g6	-6.75	0.0153	-
TRINITY_DN18223_c0_g3	5.86	0.0153	NADPH-dependent oxidoreductase 2-alkenal reductase-like [Carica papaya]
TRINITY_DN9234_c0_g1	4.27	0.0156	small heat shock protein, chloroplastic [Medicago truncatula]
TRINITY_DN7266_c0_g1	8.14	0.0156	uncharacterized protein LOC112419810 [Medicago truncatula]
TRINITY_DN15578_c0_g6	6.48	0.0156	PREDICTED: uncharacterized protein LOC109342030 isoform X1 [Lupinus angustifolius]
TRINITY_DN17990_c1_g1	2.75	0.0156	hypothetical protein TSUD_301060 [Trifolium subterraneum]
TRINITY_DN14054_c0_g4	1.82	0.0156	abscisic acid and environmental stress-inducible protein [Medicago truncatula]
TRINITY_DN16552_c1_g5	-3.27	0.0156	-
TRINITY_DN18298_c0_g1	-1.53	0.0156	UDP-glycosyltransferase 79B30 [Medicago truncatula]
TRINITY_DN18179_c0_g1	1.78	0.0156	soyasapogenol B glucuronide galactosyltransferase [Medicago truncatula]
TRINITY_DN10939_c0_g2	1.74	0.0156	putative pectinesterase [Medicago truncatula]
TRINITY_DN3391_c0_g1	5.56	0.0158	fructose-bisphosphate aldolase [Codonopsis lanceolata]
TRINITY_DN17939_c1_g3	7.56	0.016	-
TRINITY_DN8047_c0_g1	-4.13	0.016	uncharacterized protein LOC11439266 [Medicago truncatula]
TRINITY_DN10441_c0_g1	5.85	0.0161	PREDICTED: 17.3 kDa class II heat shock protein-like [Erythranthe guttata]
TRINITY_DN14837_c0_g3	-4.18	0.0161	putative reverse transcriptase zinc-binding domain-containing protein [Medicago truncatula]
TRINITY_DN9148_c1_g2	-3.77	0.0161	phospholipase D alpha 4 [Medicago truncatula]
TRINITY_DN8747_c0_g1	4.83	0.0167	Major pollen allergen Lol pI [Corchorus capsularis]
TRINITY_DN18375_c0_g5	-8	0.0169	-
TRINITY_DN18711_c0_g6	5.58	0.0175	succinate dehydrogenase [ubiquinone] iron-sulfur subunit 2, mitochondrial [Medicago truncatula]
TRINITY_DN12501_c0_g1	-1.53	0.0175	uncharacterized protein LOC11418076 [Medicago truncatula]
TRINITY_DN17197_c1_g2	-3.18	0.0177	CO(2)-response secreted protease [Medicago truncatula]
TRINITY_DN15527_c0_g10	2.23	0.0178	RNA polymerase II transcriptional coactivator KIWI isoform X1 [Cicer arietinum]
TRINITY_DN15708_c1_g5	4.67	0.0178	dnaJ protein homolog [Helianthus annuus]
TRINITY_DN13661_c2_g2	-4.63	0.0179	hypothetical protein TSUD_153800 [Trifolium subterraneum]
TRINITY_DN9959_c0_g1	7.89	0.0179	60S ribosomal protein L13-1 isoform X2 [Selaginella moellendorffii]
TRINITY_DN17355_c0_g5	3.82	0.0182	histone-lysine N-methyltransferase family member SUVH9-like [Cicer arietinum]
TRINITY_DN6827_c0_g1	5.95	0.0185	-
TRINITY_DN14524_c0_g4	4.89	0.019	F-box protein SKIP1 [Medicago truncatula]
TRINITY_DN14519_c2_g2	3.63	0.0194	uncharacterized protein LOC107620419 [Arachis ipaensis]
TRINITY_DN18678_c3_g1	4.22	0.0194	hypothetical protein TSUD_115710 [Trifolium subterraneum]
TRINITY_DN12270_c0_g1	-2.16	0.0194	1-aminocyclopropane-1-carboxylate oxidase homolog 1 [Medicago truncatula]
TRINITY_DN18641_c3_g1	-4.64	0.0195	putative P-loop containing nucleoside triphosphate hydrolase, leucine-rich repeat domain, L [Medicago truncatula]
TRINITY_DN490_c0_g1	-8.02	0.0196	-
TRINITY_DN11062_c0_g2	-5	0.0196	transcription initiation factor TFIID subunit 4b-like isoform X2 [Cicer arietinum]
TRINITY_DN10461_c0_g1	7.81	0.0198	PREDICTED: 60S ribosomal protein L19-3 [Beta vulgaris subsp. vulgaris]
TRINITY_DN17584_c0_g5	4.4	0.0199	vacuolar iron transporter-like protein [Medicago truncatula]
TRINITY_DN16777_c2_g2	1.99	0.0201	photosystem II 44 kDa protein (chloroplast) [Medicago falcata]
TRINITY_DN17053_c0_g4	-1.65	0.0207	protein SIEVE ELEMENT OCCLUSION B [Medicago truncatula]
TRINITY_DN8248_c0_g2	7.8	0.0208	hypothetical protein Ahy_B06g081003 [Arachis hypogaea]
TRINITY_DN19170_c0_g1	7.77	0.0212	NADH dehydrogenase subunit 3 (mitochondrion) [Micromonas commoda]
TRINITY_DN14651_c0_g4	-7.72	0.0214	TMV resistance protein N-like isoform X1 [Arachis duranensis]
TRINITY_DN14599_c0_g1	-2.08	0.0215	uncharacterized protein LOC25486114 [Medicago truncatula]
TRINITY_DN9824_c0_g2	5.8	0.0215	D-galacturonate reductase-like [Lactuca sativa]
TRINITY_DN16997_c0_g3	-7.7	0.0215	putative disease resistance protein RGA3 [Medicago truncatula]
TRINITY_DN60_c0_g1	4.59	0.0215	-
TRINITY_DN15882_c0_g1	-1.35	0.0216	zinc transporter 11 [Medicago truncatula]
TRINITY_DN17039_c1_g1	-4.29	0.0216	LEAF RUST 10 DISEASE-RESISTANCE LOCUS RECEPTOR-LIKE PROTEIN KINASE-like 2.2 [Medicago truncatula]
TRINITY_DN8884_c0_g2	7.75	0.0216	-
TRINITY_DN15626_c1_g3	7.21	0.0217	-
TRINITY_DN499_c0_g1	5.65	0.0218	uncharacterized protein LOC112416647 [Medicago truncatula]
TRINITY_DN16725_c1_g1	2.45	0.0221	probable caffeoyl-CoA O-methyltransferase At4g26220 isoform X1 [Medicago truncatula]
TRINITY_DN13874_c0_g2	6.69	0.0223	-
TRINITY_DN17683_c0_g2	4.05	0.0223	-
TRINITY_DN8668_c0_g2	7.7	0.0223	predicted protein [Hordeum vulgare subsp. vulgare]
TRINITY_DN16849_c0_g6	6	0.0223	hypothetical protein MtrunA17_Chr1g0170461 [Medicago truncatula]
TRINITY_DN16327_c0_g2	-1.65	0.0226	MLP-like protein 28 [Medicago truncatula]
TRINITY_DN18855_c0_g1	3.88	0.0234	3beta-hydroxysteroid-dehydrogenase/decarboxylase isoform X1 [Abrus precatorius]
TRINITY_DN17439_c1_g2	-3.82	0.0234	protein NRT1/ PTR FAMILY 5.3 isoform X1 [Medicago truncatula]
TRINITY_DN18795_c1_g4	3.43	0.0234	hyoscyamine 6-dioxygenase-like [Medicago truncatula]
TRINITY_DN14269_c0_g1	7.67	0.0234	hypothetical protein MTR_1g041525 [Medicago truncatula]
TRINITY_DN15369_c0_g3	-7.63	0.0234	cytochrome C biogenesis protein ccsA [Medicago truncatula]
TRINITY_DN13640_c0_g2	-3.92	0.0234	-
TRINITY_DN12834_c0_g2	3.92	0.0234	uncharacterized protein LOC25499667 [Medicago truncatula]
TRINITY_DN16539_c0_g5	6.19	0.0234	hypothetical protein MtrunA17_Chr3g0096661 [Medicago truncatula]
TRINITY_DN7060_c0_g2	-7.58	0.0234	-
TRINITY_DN18891_c3_g3	-6.67	0.0234	hypothetical protein TSUD_222720 [Trifolium subterraneum]
TRINITY_DN8921_c0_g1	7.65	0.0234	predicted protein [Hordeum vulgare subsp. vulgare]
TRINITY_DN9819_c1_g4	7.65	0.0234	60S ribosomal protein L28-2-like [Cicer arietinum]
TRINITY_DN335_c0_g1	6.87	0.0234	flagellar associated [Chlorella sorokiniana]
TRINITY_DN8690_c0_g1	7.68	0.0238	predicted protein [Hordeum vulgare subsp. vulgare]
TRINITY_DN16776_c0_g2	-2.27	0.0241	putative glycerophosphodiester phosphodiesterase, protein kinase RLK-Pelle-LRK10L-2 family [Medicago truncatula]
TRINITY_DN18564_c0_g2	2.83	0.0241	hypothetical protein TSUD_43410 [Trifolium subterraneum]
TRINITY_DN6442_c0_g3	6.74	0.0242	epidermis-specific secreted glycoprotein EP1 [Prunus persica]
TRINITY_DN12269_c2_g2	-5.7	0.0244	putative transferase [Medicago truncatula]
TRINITY_DN6483_c0_g1	7	0.0244	cysteine protease [Daucus carota]
TRINITY_DN15592_c0_g6	-1.41	0.0246	auxin-binding protein ABP19b [Medicago truncatula]
TRINITY_DN16569_c1_g2	-2.36	0.0254	uncharacterized protein LOC25488438 [Medicago truncatula]
TRINITY_DN7158_c0_g1	5.49	0.0254	inhibitor of trypsin and hageman factor [Artemisia annua]
TRINITY_DN12933_c0_g3	3.02	0.0255	putative peroxidase, Acid phosphatase [Medicago truncatula]
TRINITY_DN18932_c1_g1	-3.22	0.0256	heat shock cognate 70 kDa protein 2-like isoform X3 [Cicer arietinum]
TRINITY_DN18667_c0_g2	1.38	0.0256	putative ribonuclease H-like domain, reverse transcriptase zinc-binding domain-containing protein [Medicago truncatula]
TRINITY_DN11110_c0_g1	5.76	0.0258	-
TRINITY_DN2481_c0_g1	7.59	0.0258	putative ribosomal protein S14 [Oryza sativa Japonica Group]
TRINITY_DN16878_c0_g2	2.53	0.0258	-
TRINITY_DN9317_c0_g1	1.83	0.0259	polygalacturonase inhibitor [Medicago truncatula]
TRINITY_DN9824_c0_g1	5.1	0.0259	D-galacturonate reductase-like [Quercus suber]
TRINITY_DN4303_c0_g1	-4.6	0.026	aluminum-activated malate transporter 12 [Medicago truncatula]
TRINITY_DN14141_c0_g1	-1.81	0.026	hypothetical protein MTR_4g088390 [Medicago truncatula]
TRINITY_DN16654_c0_g1	4.37	0.0261	putative iron-chelate-transporting ATPase [Medicago truncatula]
TRINITY_DN12638_c0_g2	-6.1	0.0262	ATPase 1-like protein [Trifolium pratense]
TRINITY_DN16885_c0_g3	1.72	0.0264	glutathione S-transferase L3 [Medicago truncatula]
TRINITY_DN17709_c1_g5	4.4	0.0264	-
TRINITY_DN16367_c1_g4	4.94	0.0265	uncharacterized protein LOC112418363 isoform X4 [Medicago truncatula]
TRINITY_DN18133_c0_g4	4.35	0.0271	uncharacterized protein LOC112421899 [Medicago truncatula]
TRINITY_DN17261_c0_g2	-2.54	0.0275	protein CELLULOSE SYNTHASE INTERACTIVE 3 [Medicago truncatula]
TRINITY_DN13983_c0_g4	2.38	0.0276	photosystem II thylakoid membrane protein (chloroplast) [Glycine max]
TRINITY_DN9359_c0_g1	7.51	0.0278	40S ribosomal protein S10-1-like [Physcomitrella patens]
TRINITY_DN13527_c0_g1	2.27	0.0279	late embryogenesis abundant protein [Medicago truncatula]
TRINITY_DN9104_c0_g2	7.51	0.0279	PREDICTED: 60S ribosomal protein L9-like [Musa acuminata subsp. malaccensis]
TRINITY_DN16955_c0_g3	1.49	0.0282	orf187 (mitochondrion) [Bupleurum falcatum]
TRINITY_DN4744_c0_g1	6.18	0.0283	-
TRINITY_DN17039_c1_g4	3.57	0.0283	rust resistance kinase Lr10 isoform X2 [Medicago truncatula]
TRINITY_DN13395_c0_g1	4.41	0.0285	21 kDa protein-like [Helianthus annuus]
TRINITY_DN15220_c0_g2	-4.18	0.0287	putative F-box protein At3g16210 [Medicago truncatula]
TRINITY_DN7036_c0_g1	5.18	0.0287	uncharacterized protein LOC112416752 [Medicago truncatula]
TRINITY_DN8764_c0_g1	7.52	0.0287	hypothetical protein AXG93_2891s1450 [Marchantia polymorpha subsp. ruderalis]
TRINITY_DN14420_c0_g2	2.71	0.029	hypothetical protein L195_g061344, partial [Trifolium pratense]
TRINITY_DN18450_c0_g3	5.22	0.0292	protein FAR1-RELATED SEQUENCE 5-like [Medicago truncatula]
TRINITY_DN3277_c0_g1	5.18	0.0292	DUF724 domain-containing protein 3 isoform X1 [Medicago truncatula]
TRINITY_DN17037_c0_g4	1.71	0.0292	putative plant disease resistance response protein [Medicago truncatula]
TRINITY_DN18811_c2_g3	3.3	0.0292	F-box protein [Medicago truncatula]
TRINITY_DN15124_c0_g1	1.32	0.0293	uncharacterized protein LOC11427581 [Medicago truncatula]
TRINITY_DN18588_c0_g1	3.75	0.0293	TMV resistance protein N [Medicago truncatula]
TRINITY_DN15601_c0_g6	-7.38	0.0293	-
TRINITY_DN18264_c0_g1	1.83	0.0293	hypothetical protein (mitochondrion) [Glycine soja]
TRINITY_DN12463_c0_g2	4.92	0.0293	protein ECERIFERUM 2 [Medicago truncatula]
TRINITY_DN523_c0_g1	4.1	0.0293	monothiol glutaredoxin-S6 [Medicago truncatula]
TRINITY_DN10148_c0_g2	3.38	0.0293	putative axial regulator YABBY 2 isoform X1 [Medicago truncatula]
TRINITY_DN17224_c1_g5	5.94	0.0294	-
TRINITY_DN14741_c1_g2	3.28	0.0294	-
TRINITY_DN5552_c0_g1	7.42	0.0295	PREDICTED: 60S ribosomal protein L35 [Elaeis guineensis]
TRINITY_DN12990_c0_g3	1.68	0.0295	unknown [Medicago truncatula]
TRINITY_DN14983_c0_g6	5.25	0.0296	-
TRINITY_DN13422_c0_g9	7.42	0.0297	60S acidic ribosomal P2 [Micractinium conductrix]
TRINITY_DN11915_c0_g7	4.99	0.0298	alkane hydroxylase MAH1 [Medicago truncatula]
TRINITY_DN8448_c0_g2	7.43	0.0298	60S ribosomal protein L29-1-like [Cucurbita pepo subsp. pepo]
TRINITY_DN18156_c0_g3	-3.81	0.0298	-
TRINITY_DN9168_c0_g2	7.4	0.0303	40S ribosomal protein S7-like [Physcomitrella patens]
TRINITY_DN15285_c1_g4	-4.1	0.0303	-
TRINITY_DN14983_c0_g4	-2.49	0.0304	hypothetical protein MTR_4g127740 [Medicago truncatula]
TRINITY_DN16955_c0_g2	2.17	0.0306	hypothetical protein DCAR_032037 [Daucus carota subsp. sativus]
TRINITY_DN12483_c4_g3	-1.82	0.0306	cytochrome P450 CYP73A100 [Medicago truncatula]
TRINITY_DN9502_c0_g1	4.57	0.0306	zinc finger CCCH domain protein [Medicago truncatula]
TRINITY_DN18235_c1_g6	2.06	0.031	glycoside hydrolase family 1 protein [Medicago truncatula]
TRINITY_DN17172_c0_g1	5	0.031	serine/threonine-protein kinase CTR1-like [Lactuca sativa]
TRINITY_DN17039_c1_g2	4.73	0.031	receptor-like protein kinase, partial [Trifolium pratense]
TRINITY_DN9124_c0_g2	7.36	0.0313	uncharacterized protein LOC100306335 [Glycine max]
TRINITY_DN17764_c0_g2	5.85	0.0315	GDSL esterase/lipase At5g33370 [Medicago truncatula]
TRINITY_DN13216_c0_g1	5.39	0.0319	hypothetical protein MTR_4g053550 [Medicago truncatula]
TRINITY_DN16649_c0_g1	2.24	0.0319	putative leucine-rich repeat receptor-like protein kinase [Glycine soja]
TRINITY_DN13800_c1_g3	1.34	0.0319	ATP synthase CF1 beta subunit (chloroplast) [Medicago hybrida]
TRINITY_DN18860_c0_g4	-3.94	0.032	-
TRINITY_DN9144_c0_g2	-1.58	0.0326	nitrate regulatory gene2 protein [Medicago truncatula]
TRINITY_DN18811_c2_g1	4.68	0.0326	uncharacterized protein LOC112419312 [Medicago truncatula]
TRINITY_DN18960_c2_g1	2.2	0.033	ATP synthase subunit beta, chloroplastic [Artemisia annua]
TRINITY_DN186_c0_g1	7.51	0.0331	receptor-like kinase, putative [Medicago truncatula]
TRINITY_DN16825_c1_g4	-5.23	0.0331	hydroquinone glucosyltransferase [Medicago truncatula]
TRINITY_DN10992_c0_g1	3.54	0.0333	hypothetical protein MtrunA17_Chr8g0366701 [Medicago truncatula]
TRINITY_DN7204_c0_g2	7.37	0.0333	putative endonuclease/exonuclease/phosphatase [Medicago truncatula]
TRINITY_DN19115_c0_g1	7.45	0.0334	-
TRINITY_DN13403_c1_g1	1.88	0.0335	seed linoleate 9S-lipoxygenase [Medicago truncatula]
TRINITY_DN15854_c0_g3	2.46	0.0336	cyanogenic beta-glucosidase, putative [Medicago truncatula]
TRINITY_DN13626_c0_g4	1.79	0.0339	'photosystem I P700 apoprotein A1 (chloroplast) [Vicia sativa]
TRINITY_DN17547_c0_g3	3.54	0.034	-
TRINITY_DN10416_c0_g2	7.28	0.0343	-
TRINITY_DN14373_c0_g1	5.21	0.0344	-
TRINITY_DN18927_c0_g3	-1.42	0.0345	S-adenosylmethionine synthase [Medicago truncatula]
TRINITY_DN17387_c0_g3	-3.82	0.0347	hypothetical protein MtrunA17_Chr1g0204431 [Medicago truncatula]
TRINITY_DN4696_c0_g1	-5.92	0.0348	-
TRINITY_DN16599_c1_g1	5.81	0.0359	putative glycerophosphodiester phosphodiesterase, protein kinase RLK-Pelle-LRK10L-2 family [Medicago truncatula]
TRINITY_DN8784_c0_g1	7.23	0.0359	Ribosomal protein L1, 2-layer alpha/beta-sandwich [Ostreococcus tauri]
TRINITY_DN17888_c1_g8	3.57	0.036	S-protein homolog 5 [Medicago truncatula]
TRINITY_DN7246_c0_g2	-6.33	0.0366	hypothetical protein TSUD_258610 [Trifolium subterraneum]
TRINITY_DN17994_c0_g3	7.18	0.0367	-
TRINITY_DN17809_c0_g1	-4.18	0.037	hypothetical protein MTR_2g425990 [Medicago truncatula]
TRINITY_DN18702_c0_g1	-2.92	0.0372	probable disease resistance protein At5g63020 [Medicago truncatula]
TRINITY_DN14759_c1_g2	2.03	0.0372	zinc-finger homeodomain protein 2 [Medicago truncatula]
TRINITY_DN18091_c0_g6	7.25	0.0372	-
TRINITY_DN13495_c0_g3	-3.13	0.0372	uncharacterized protein LOC112419103 isoform X2 [Medicago truncatula]
TRINITY_DN13853_c0_g1	4.27	0.0373	hypothetical protein MTR_6g072515 [Medicago truncatula]
TRINITY_DN14720_c1_g1	5.31	0.0373	-
TRINITY_DN17339_c1_g5	1.6	0.0373	nucleoside-triphosphatase [Medicago truncatula]
TRINITY_DN14759_c1_g4	3.98	0.0374	zinc-finger homeodomain protein 2 [Medicago truncatula]
TRINITY_DN1764_c0_g1	7.16	0.0375	-
TRINITY_DN16567_c1_g1	2.56	0.0377	allene oxide cyclase, chloroplastic [Medicago truncatula]
TRINITY_DN9209_c0_g1	6.19	0.0378	60S acidic ribosomal protein P1 [Monoraphidium neglectum]
TRINITY_DN14790_c0_g2	4.37	0.0378	-
TRINITY_DN17372_c0_g3	-7.18	0.0378	putative AC transposase, partial [Glycine soja]
TRINITY_DN14371_c0_g3	4.67	0.0379	transcription factor bHLH35-like isoform X2 [Abrus precatorius]
TRINITY_DN11003_c0_g2	-3.87	0.038	tesmin/TSO1-like CXC domain protein [Medicago truncatula]
TRINITY_DN1341_c0_g1	-2.85	0.038	putative chitinase [Medicago truncatula]
TRINITY_DN18578_c0_g2	3.8	0.038	-
TRINITY_DN18479_c1_g2	1.71	0.0386	soyasaponin III rhamnosyltransferase [Medicago truncatula]
TRINITY_DN14760_c0_g4	-1.39	0.039	putative laccase [Medicago truncatula]
TRINITY_DN8179_c0_g1	4.51	0.039	blue copper protein-like [Cicer arietinum]
TRINITY_DN14103_c0_g2	-1.6	0.039	beta-galactosidase 6 isoform X1 [Medicago truncatula]
TRINITY_DN8694_c1_g1	7.15	0.0395	predicted protein [Hordeum vulgare subsp. vulgare]
TRINITY_DN9408_c0_g1	7.19	0.0396	Sterol desaturase [Medicago truncatula]
TRINITY_DN15352_c2_g5	-1.65	0.0396	SNF1-related kinase regulatory subunit beta-2 [Medicago truncatula]
TRINITY_DN9968_c0_g1	-2.33	0.0402	acetylserotonin O-methyltransferase [Medicago truncatula]
TRINITY_DN7018_c0_g1	6.21	0.0405	transcriptional factor B3 family protein [Medicago truncatula]
TRINITY_DN11037_c0_g1	6.03	0.0408	-
TRINITY_DN10269_c0_g3	1.51	0.0408	pentatricopeptide repeat-containing protein At2g15690, mitochondrial [Medicago truncatula]
TRINITY_DN17987_c0_g2	1.81	0.0408	uncharacterized protein LOC25488247 [Medicago truncatula]
TRINITY_DN9004_c0_g2	-7.1	0.0408	hypothetical protein MtrunA17_Chr4g0056751 [Medicago truncatula]
TRINITY_DN17673_c0_g2	3.16	0.0408	cationic amino acid transporter 2, vacuolar [Medicago truncatula]
TRINITY_DN8486_c0_g1	-5.08	0.0412	branched-chain-amino-acid aminotransferase 2, chloroplastic isoform X1 [Medicago truncatula]
TRINITY_DN18581_c1_g2	1.9	0.0415	NAD(P)H-quinone oxidoreductase chain 4 [Medicago truncatula]
TRINITY_DN17215_c0_g2	3.28	0.0415	-
TRINITY_DN11537_c0_g1	-1.52	0.0415	putative triacylglycerol lipase [Medicago truncatula]
TRINITY_DN18991_c0_g1	5.4	0.0416	non-specific lipid-transfer protein 1 [Medicago truncatula]
TRINITY_DN17905_c0_g5	6.18	0.0417	-
TRINITY_DN11432_c0_g1	3.37	0.0417	probable 2-oxoglutarate-dependent dioxygenase At5g05600 [Medicago truncatula]
TRINITY_DN18656_c0_g2	3.32	0.0417	ankyrin repeat protein [Medicago truncatula]
TRINITY_DN18530_c1_g2	4.64	0.0417	10-hydroxygeraniol oxidoreductase [Codonopsis lanceolata]
TRINITY_DN13104_c1_g3	3.55	0.0417	-
TRINITY_DN1862_c0_g1	-7	0.0417	-
TRINITY_DN17124_c1_g1	2.98	0.0419	putative TIR domain, winged helix-turn-helix DNA-binding domain-containing protein [Medicago truncatula]
TRINITY_DN16518_c0_g1	-1.8	0.0422	chaperone DnaJ-like protein [Medicago sativa]
TRINITY_DN14245_c1_g3	3.2	0.0423	uncharacterized protein LOC25493156 [Medicago truncatula]
TRINITY_DN18296_c0_g1	2.46	0.0423	-
TRINITY_DN14081_c1_g2	-7.13	0.0423	-
TRINITY_DN13462_c0_g6	4.6	0.0424	putative protein kinase RLK-Pelle-LRR-VII-3 family [Medicago truncatula]
TRINITY_DN6372_c0_g1	5.42	0.0426	hypothetical protein CBR_g8681 [Chara braunii]
TRINITY_DN9884_c0_g1	7.03	0.043	60S ribosomal L30 [Chlorella sorokiniana]
TRINITY_DN4860_c0_g1	4.84	0.044	glucan endo-1,3-beta-glucosidase, basic vacuolar isoform [Durio zibethinus]
TRINITY_DN6154_c0_g1	6.2	0.0441	hypothetical protein L195_g011223 [Trifolium pratense]
TRINITY_DN17078_c0_g2	-3.64	0.0442	protein FAR1-related sequence 5-like [Trifolium pratense]
TRINITY_DN12469_c0_g1	7.02	0.0442	disease resistance protein (TIR-NBS-LRR class) [Medicago truncatula]
TRINITY_DN9836_c0_g2	5.68	0.045	putative transcription factor C2C2-YABBY family [Medicago truncatula]
TRINITY_DN18461_c0_g1	-1.73	0.045	cellulose synthase-like protein E1 isoform X2 [Medicago truncatula]
TRINITY_DN9231_c0_g1	4.57	0.045	S-adenosylmethionine synthase 1 [Populus trichocarpa]
TRINITY_DN16270_c0_g2	1.72	0.045	-
TRINITY_DN18553_c0_g1	-1.42	0.0455	uncharacterized protein LOC112418648 [Medicago truncatula]
TRINITY_DN18735_c1_g5	3.74	0.0456	-
TRINITY_DN18494_c1_g1	1.72	0.0463	cellulose synthase-like protein G3 [Medicago truncatula]
TRINITY_DN7794_c0_g1	6.98	0.0464	Ribosomal protein S5/S7, eukaryotic/archaeal [Ostreococcus tauri]
TRINITY_DN15975_c0_g2	1.58	0.0466	class I heat shock protein [Trifolium pratense]
TRINITY_DN15932_c0_g1	-2.86	0.0466	putative P-loop containing nucleoside triphosphate hydrolase, leucine-rich repeat domain, L [Medicago truncatula]
TRINITY_DN18335_c0_g2	-2.47	0.0466	rust resistance kinase Lr10 [Medicago truncatula]
TRINITY_DN18388_c0_g2	6.14	0.0469	TMV resistance protein N isoform X2 [Medicago truncatula]
TRINITY_DN18923_c0_g1	1.95	0.0469	uncharacterized protein LOC11443301 [Medicago truncatula]
TRINITY_DN18726_c0_g2	7	0.047	putative phosphoenolpyruvate carboxylase [Medicago truncatula]
TRINITY_DN17416_c0_g5	1.66	0.0477	superoxide dismutase [Fe] 3, chloroplastic [Medicago truncatula]
TRINITY_DN14279_c0_g4	-1.59	0.0477	putative transcription factor bZIP family [Medicago truncatula]
TRINITY_DN8677_c0_g1	2.15	0.0486	1-aminocyclopropane-1-carboxylate oxidase homolog 4 [Medicago truncatula]
TRINITY_DN433_c0_g1	-4.41	0.0486	-
TRINITY_DN7068_c0_g1	6.9	0.0486	-
TRINITY_DN17826_c0_g1	2.31	0.0486	uncharacterized protein LOC11427581 [Medicago truncatula]
TRINITY_DN17358_c0_g4	3.24	0.0486	-
TRINITY_DN4851_c0_g1	4.49	0.0486	UDP-glucosyltransferase 73A22 [Centella asiatica]
TRINITY_DN16423_c1_g1	-1.36	0.0486	pleiotropic drug resistance protein 1 [Medicago truncatula]
TRINITY_DN14922_c0_g1	4.4	0.0486	heat shock cognate 70 kDa protein 2 [Cicer arietinum]
TRINITY_DN6956_c0_g1	1.98	0.0488	hypothetical protein MTR_4g090545 [Medicago truncatula]
TRINITY_DN7232_c0_g2	5.29	0.0489	sucrose:sucrose 1-fructosyl transferase [Taraxacum officinale]
TRINITY_DN12108_c1_g1	1.94	0.0492	phosphoenolpyruvate carboxykinase (ATP) [Medicago truncatula]
TRINITY_DN14436_c0_g1	-4.11	0.0493	retrovirus-related Pol polyprotein from transposon TNT 1-94 [Dorcoceras hygrometricum]
TRINITY_DN17376_c3_g2	-4.2	0.0493	-
TRINITY_DN16683_c0_g8	-2.4	0.0495	probable serine/threonine-protein kinase irlF [Medicago truncatula]
TRINITY_DN12843_c0_g4	5.69	0.0495	BURP domain protein RD22 [Medicago truncatula]
TRINITY_DN7859_c0_g1	6.94	0.0495	-
TRINITY_DN17804_c0_g1	2.14	0.0499	-
TRINITY_DN17826_c0_g3	-2.87	0.0499	endonuclease/exonuclease/phosphatase family protein [Medicago truncatula]

## Sheet: Table S4
Table S4. GO functional annotations of DGEs between two cultivars of M. ruthenica stems
Ontology	Class	GO ID	No. of up-regulation unigenes	No. of down-regulation unigenes	Total	Pvalue
molecular_function	protein binding	0005515	21	13	34	0.925552
molecular_function	molecular_function	0003674	21	10	31	0.994183
molecular_function	structural constituent of ribosome	0003735	26		26	3.34682e-07
molecular_function	DNA binding	0003677	15	5	20	0.767522
molecular_function	metal ion binding	0046872	15	4	19	0.544499
molecular_function	DNA binding transcription factor activity	0003700	11	7	18	0.767958
molecular_function	ATP binding	0005524	6	7	13	0.995858
molecular_function	RNA binding	0003723	11	2	13	0.724638
molecular_function	quercetin 3-O-glucosyltransferase activity	0080043	6	3	9	0.0058904
molecular_function	quercetin 7-O-glucosyltransferase activity	0080044	6	3	9	0.0058904
molecular_function	RNA polymerase II regulatory region sequence-specific DNA binding	0000977	3	6	9	0.00416382
molecular_function	zinc ion binding	0008270	6	3	9	0.891722
molecular_function	dioxygenase activity	0051213	5	2	7	0.00159616
molecular_function	hydrolase activity	0016787	3	4	7	0.428209
molecular_function	kinase activity	0016301	6	1	7	0.941084
molecular_function	RNA-directed DNA polymerase activity	0003964	5	2	7	1.24659e-05
molecular_function	transferase activity, transferring glycosyl groups	0016757	1	6	7	0.252513
molecular_function	ADP binding	0043531	3	3	6	0.209665
molecular_function	antigen binding	0003823	5		5	8.57398e-09
molecular_function	copper ion binding	0005507	2	3	5	0.0793649
molecular_function	cysteine-type endopeptidase activity	0004197	3	2	5	0.00178086
molecular_function	electron transfer activity	0009055	4	1	5	0.0324058
molecular_function	immunoglobulin receptor binding	0034987	5		5	8.57398e-09
molecular_function	protein dimerization activity	0046983	2	3	5	0.0680357
molecular_function	protein homodimerization activity	0042803	5		5	0.138966
molecular_function	2 iron, 2 sulfur cluster binding	0051537	3	1	4	0.00436957
molecular_function	acid phosphatase activity	0003993	3	1	4	0.00674479
molecular_function	ATPase activity, coupled to transmembrane movement of substances	0042626	2	2	4	0.322295
molecular_function	calcium ion binding	0005509	3	1	4	0.512793
molecular_function	carboxylic ester hydrolase activity	0052689	2	2	4	0.161411
molecular_function	hydrolase activity, hydrolyzing O-glycosyl compounds	0004553	2	2	4	0.28757
molecular_function	linoleate 13S-lipoxygenase activity	0016165	4		4	0.000405277
molecular_function	monooxygenase activity	0004497	3	1	4	0.064891
molecular_function	NADH dehydrogenase (ubiquinone) activity	0008137	4		4	0.00144341
molecular_function	oxidoreductase activity, acting on paired donors, with incorporation or reduction of molecular oxygen, NAD(P)H as one donor, and incorporation of one atom of oxygen	0016709	2	2	4	0.148504
molecular_function	protein self-association	0043621	3	1	4	0.0185222
molecular_function	rRNA binding	0019843	4		4	0.022993
molecular_function	serine-type endopeptidase inhibitor activity	0004867	4		4	0.000131896
molecular_function	ubiquitin-protein transferase activity	0004842	2	2	4	0.879004
molecular_function	ATP-dependent 3'-5' DNA helicase activity	0043140	3		3	0.017206
molecular_function	beta-glucosidase activity	0008422	3		3	0.0442349
molecular_function	catalytic activity	0003824	1	2	3	0.704708
molecular_function	cellulose synthase (UDP-forming) activity	0016760	1	2	3	0.0543634
molecular_function	cellulose synthase activity	0016759	1	2	3	0.0684302
molecular_function	cytochrome-c oxidase activity	0004129	3		3	0.00605903
molecular_function	four-way junction helicase activity	0009378	3		3	0.0157897
molecular_function	glucomannan 4-beta-mannosyltransferase activity	0047259		3	3	0.000263299
molecular_function	heme binding	0020037	3		3	0.250741
molecular_function	mannan synthase activity	0051753		3	3	0.0087127
molecular_function	mRNA binding	0003729	3		3	0.833862
molecular_function	oxidoreductase activity	0016491	3		3	0.742091
molecular_function	oxidoreductase activity, oxidizing metal ions	0016722		3	3	0.0290481
molecular_function	phosphatase activity	0016791	2	1	3	0.0491707
molecular_function	protein serine/threonine kinase activity	0004674	2	1	3	0.999958
molecular_function	transcription regulatory region DNA binding	0044212		3	3	0.794423
molecular_function	translation elongation factor activity	0003746	2	1	3	0.104382
molecular_function	transporter activity	0005215	2	1	3	0.584155
molecular_function	3 iron, 4 sulfur cluster binding	0051538	1	1	2	0.00172224
molecular_function	4 iron, 4 sulfur cluster binding	0051539	1	1	2	0.156024
molecular_function	arsenate reductase (glutaredoxin) activity	0008794	2		2	0.00976186
molecular_function	calmodulin binding	0005516	2		2	0.772183
molecular_function	carbohydrate binding	0030246	2		2	0.503338
molecular_function	chitinase activity	0004568	1	1	2	0.0880458
molecular_function	chromatin binding	0003682	1	1	2	0.750866
molecular_function	cinnamyl-alcohol dehydrogenase activity	0045551	2		2	0.0336977
molecular_function	codeinone reductase (NADPH) activity	0047036	2		2	0.00283783
molecular_function	enzyme inhibitor activity	0004857	2		2	0.0455246
molecular_function	galactinol-raffinose galactosyltransferase activity	0047268	2		2	0.000871019
molecular_function	glutathione transferase activity	0004364	2		2	0.236982
molecular_function	GTPase activity	0003924	1	1	2	0.844374
molecular_function	guiding stereospecific synthesis activity	0042349	1	1	2	0.0266072
molecular_function	iron ion binding	0005506	2		2	0.351013
molecular_function	large ribosomal subunit rRNA binding	0070180	2		2	0.0497589
molecular_function	lipid binding	0008289	2		2	0.555555
molecular_function	methionine adenosyltransferase activity	0004478	1	1	2	0.0202154
molecular_function	N-acetyltransferase activity	0008080	1	1	2	0.0172994
molecular_function	nucleic acid binding	0003676	2		2	0.975921
molecular_function	nucleotide binding	0000166	2		2	0.783638
molecular_function	nutrient reservoir activity	0045735	1	1	2	0.0300686
molecular_function	O-acetyltransferase activity	0016413	1	1	2	0.243342
molecular_function	oxalate decarboxylase activity	0046564		2	2	0.0266072
molecular_function	peptidase activity	0008233	2		2	0.30066
molecular_function	phosphatidylcholine binding	0031210	2		2	0.00283783
molecular_function	polygalacturonase inhibitor activity	0090353	2		2	0.00172224
molecular_function	polysaccharide binding	0030247	1	1	2	0.394028
molecular_function	protein binding involved in protein folding	0044183	2		2	0.186625
molecular_function	protein disulfide oxidoreductase activity	0015035	2		2	0.387958
molecular_function	protein serine/threonine phosphatase activity	0004722	2		2	0.64369
molecular_function	S-adenosylmethionine-dependent methyltransferase activity	0008757	1	1	2	0.580168
molecular_function	sequence-specific DNA binding	0043565		2	2	0.999043
molecular_function	sinapyl alcohol dehydrogenase activity	0052747	2		2	0.0266072
molecular_function	succinate dehydrogenase (ubiquinone) activity	0008177	1	1	2	0.00283783
molecular_function	succinate dehydrogenase activity	0000104	1	1	2	0.00172224
molecular_function	superoxide dismutase activity	0004784	2		2	0.0120648
molecular_function	transcription regulatory region sequence-specific DNA binding	0000976		2	2	0.0880458
molecular_function	transferase activity	0016740	2		2	0.760204
molecular_function	transferase activity, transferring acyl groups	0016746	1	1	2	0.150025
molecular_function	transferase activity, transferring acyl groups other than amino-acyl groups	0016747	2		2	0.205362
molecular_function	ubiquitin protein ligase binding	0031625	2		2	0.612922
molecular_function	unfolded protein binding	0051082	2		2	0.418026
molecular_function	12-oxophytodienoate reductase activity	0016629	1		1	0.0340251
molecular_function	3'-5' DNA helicase activity	0043138		1	1	0.114121
molecular_function	3-deoxy-7-phosphoheptulonate synthase activity	0003849		1	1	0.0340251
molecular_function	actin monomer binding	0003785	1		1	0.129327
molecular_function	allene-oxide cyclase activity	0046423	1		1	0.0340251
molecular_function	amino acid binding	0016597		1	1	0.129327
molecular_function	amino acid transmembrane transporter activity	0015171		1	1	0.736858
molecular_function	antiporter activity	0015297	1		1	0.454615
molecular_function	aryl-alcohol dehydrogenase (NADP+) activity	0047681	1		1	0.0171594
molecular_function	aspartic-type endopeptidase activity	0004190	1		1	0.722784
molecular_function	ATPase activity	0016887	1		1	0.950519
molecular_function	ATP-dependent RNA helicase activity	0004004	1		1	0.83825
molecular_function	benzoate-CoA ligase activity	0018858	1		1	0.0171594
molecular_function	beta-galactosidase activity	0004565		1	1	0.328534
molecular_function	bile acid binding	0032052	1		1	0.0171594
molecular_function	branched-chain-amino-acid transaminase activity	0004084		1	1	0.08291
molecular_function	caffeoyl-CoA O-methyltransferase activity	0042409	1		1	0.0506022
molecular_function	carbohydrate:proton symporter activity	0005351		1	1	0.686956
molecular_function	carveol dehydrogenase activity	0018459	1		1	0.0506022
molecular_function	cellulase activity	0008810		1	1	0.280353
molecular_function	chaperone binding	0051087	1		1	0.435375
molecular_function	chitin binding	0008061		1	1	0.405238
molecular_function	cholesterol binding	0015485	1		1	0.08291
molecular_function	cholesterol transporter activity	0017127	1		1	0.0668955
molecular_function	clathrin binding	0030276	1		1	0.340068
molecular_function	copper-transporting ATPase activity	0043682		1	1	0.114121
molecular_function	CTPase activity	0043273	1		1	0.0340251
molecular_function	dihydrofolate synthase activity	0008841	1		1	0.0668955
molecular_function	DNA helicase activity	0003678		1	1	0.292712
molecular_function	endopeptidase activity	0004175	1		1	0.405238
molecular_function	ent-kaurenoate oxidase activity	0051777	1		1	0.0668955
molecular_function	enzyme binding	0019899	1		1	0.215249
molecular_function	ferric iron binding	0008199	1		1	0.173401
molecular_function	fibroblast growth factor binding	0017134	1		1	0.0506022
molecular_function	flavonol-3-O-glucoside L-rhamnosyltransferase activity	0047230	1		1	0.0506022
molecular_function	fructokinase activity	0008865	1		1	0.215249
molecular_function	fructose-bisphosphate aldolase activity	0004332	1		1	0.173401
molecular_function	galactolipase activity	0047714	1		1	0.0986503
molecular_function	glucose transmembrane transporter activity	0005355		1	1	0.586763
molecular_function	glutamate-cysteine ligase activity	0004357		1	1	0.0340251
molecular_function	GTP binding	0005525	1		1	0.953042
molecular_function	high-density lipoprotein particle receptor binding	0070653	1		1	0.0506022
molecular_function	histone deacetylase activity	0004407		1	1	0.351404
molecular_function	hydrolase activity, acting on ester bonds	0016788	1		1	0.762904
molecular_function	hydrolase activity, acting on glycosyl bonds	0016798	1		1	0.572174
molecular_function	identical protein binding	0042802	1		1	0.859263
molecular_function	IgA binding	0019862	1		1	0.0506022
molecular_function	iron ion transmembrane transporter activity	0005381	1		1	0.158962
molecular_function	isoliquiritigenin 2'-O-methyltransferase activity	0033802		1	1	0.0171594
molecular_function	isopiperitenol dehydrogenase activity	0018458	1		1	0.0506022
molecular_function	L-amino acid transmembrane transporter activity	0015179	1		1	0.228723
molecular_function	L-cystine transmembrane transporter activity	0015184	1		1	0.0506022
molecular_function	licodione 2'-O-methyltransferase activity	0030751		1	1	0.0171594
molecular_function	lipase activity	0016298		1	1	0.541438
molecular_function	L-isoleucine transaminase activity	0052656		1	1	0.0506022
molecular_function	L-leucine transaminase activity	0052654		1	1	0.0506022
molecular_function	L-valine transaminase activity	0052655		1	1	0.0506022
molecular_function	lysozyme activity	0003796	1		1	0.0171594
molecular_function	malate transmembrane transporter activity	0015140		1	1	0.187592
molecular_function	manganese ion binding	0030145	1		1	0.228723
molecular_function	manganese ion transmembrane transporter activity	0005384	1		1	0.144273
molecular_function	mannitol dehydrogenase activity	0046029	1		1	0.0171594
molecular_function	metalloaminopeptidase activity	0070006	1		1	0.144273
molecular_function	microtubule binding	0008017	1		1	0.702844
molecular_function	microtubule motor activity	0003777	1		1	0.745842
molecular_function	N-acylphosphatidylethanolamine-specific phospholipase D activity	0070290		1	1	0.173401
molecular_function	NADPH dehydrogenase activity	0003959	1		1	0.173401
molecular_function	naringenin-chalcone synthase activity	0016210	1		1	0.129327
molecular_function	nuclear export signal receptor activity	0005049	1		1	0.20154
molecular_function	nucleoside-diphosphatase activity	0017110	1		1	0.0668955
molecular_function	nucleotidase activity	0008252		1	1	0.08291
molecular_function	O-methyltransferase activity	0008171		1	1	0.362547
molecular_function	oxidoreductase activity, acting on NAD(P)H, oxygen as acceptor	0050664		1	1	0.08291
molecular_function	oxidoreductase activity, acting on paired donors, with incorporation or reduction of molecular oxygen	0016705	1		1	0.340068
molecular_function	oxygen binding	0019825	1		1	0.445078
molecular_function	peptidase inhibitor activity	0030414	1		1	0.144273
molecular_function	peptide alpha-N-acetyltransferase activity	0004596		1	1	0.600856
molecular_function	peptide antigen binding	0042605	1		1	0.0171594
molecular_function	peptide binding	0042277	1		1	0.173401
molecular_function	peptidoglycan binding	0042834	1		1	0.0340251
molecular_function	peptidyl-prolyl cis-trans isomerase activity	0003755	1		1	0.727557
molecular_function	peroxidase activity	0004601	1		1	0.793676
molecular_function	phenylcoumaran benzylic ether reductase activity	0032442		1	1	0.08291
molecular_function	phosphatidate phosphatase activity	0008195	1		1	0.215249
molecular_function	phosphatidylcholine 1-acylhydrolase activity	0008970	1		1	0.129327
molecular_function	phosphatidylcholine-sterol O-acyltransferase activator activity	0060228	1		1	0.0668955
molecular_function	phosphatidylinositol binding	0035091		1	1	0.600856
molecular_function	phosphoenolpyruvate carboxykinase (ATP) activity	0004612	1		1	0.0506022
molecular_function	phosphoenolpyruvate carboxylase activity	0008964	1		1	0.20154
molecular_function	phospholipase activity	0004620	1		1	0.158962
molecular_function	phospholipase D activity	0004630		1	1	0.173401
molecular_function	P-P-bond-hydrolysis-driven protein transmembrane transporter activity	0015450		1	1	0.20154
molecular_function	pre-mRNA 5'-splice site binding	0030627		1	1	0.114121
molecular_function	protein heterodimerization activity	0046982		1	1	0.712986
molecular_function	protein kinase activator activity	0030295	1		1	0.0986503
molecular_function	protein kinase activity	0004672	1		1	0.988996
molecular_function	protein kinase binding	0019901	1		1	0.454615
molecular_function	protein serine/threonine/tyrosine kinase activity	0004712	1		1	0.607722
molecular_function	proton transmembrane transporter activity	0015078	1		1	0.08291
molecular_function	proximal promoter sequence-specific DNA binding	0000987		1	1	0.187592
molecular_function	Ran GTPase binding	0008536		1	1	0.425502
molecular_function	ribonuclease III activity	0004525	1		1	0.793676
molecular_function	ribosomal large subunit binding	0043023	1		1	0.158962
molecular_function	RNA polymerase II activity	0001055		1	1	0.241967
molecular_function	RNA polymerase II transcription factor activity, sequence-specific DNA binding	0000981		1	1	0.866421
molecular_function	serine-type endopeptidase activity	0004252		1	1	0.913561
molecular_function	single-stranded DNA binding	0003697	1		1	0.722784
molecular_function	SNAP receptor activity	0005484	1		1	0.586763
molecular_function	SNARE binding	0000149	1		1	0.600856
molecular_function	structural constituent of muscle	0008307	1		1	0.0340251
molecular_function	structural molecule activity	0005198	1		1	0.634026
molecular_function	sucrose 1F-fructosyltransferase activity	0050306	1		1	0.0340251
molecular_function	tetrahydrofolylpolyglutamate synthase activity	0004326	1		1	0.0668955
molecular_function	thiol-dependent ubiquitin-specific protease activity	0004843	1		1	0.579532
molecular_function	thiol-dependent ubiquitinyl hydrolase activity	0036459	1		1	0.445078
molecular_function	threonine-type endopeptidase activity	0004298	1		1	0.30486
molecular_function	transcription coactivator activity	0003713	1		1	0.564689
molecular_function	transcription factor activity, RNA polymerase II transcription factor recruiting	0001135		1	1	0.717927
molecular_function	transcriptional activator activity, RNA polymerase II transcription regulatory region sequence-specific DNA binding	0001228		1	1	0.692344
molecular_function	transmembrane receptor protein serine/threonine kinase activity	0004675	1		1	0.875402
molecular_function	transmembrane transporter activity	0022857		1	1	0.891599
molecular_function	triglyceride lipase activity	0004806	1		1	0.454615
molecular_function	ubiquinol-cytochrome-c reductase activity	0008121	1		1	0.173401
molecular_function	ubiquitin protein ligase activity	0061630		1	1	0.984106
molecular_function	UDP-N-acetylglucosamine diphosphorylase activity	0003977		1	1	0.08291
molecular_function	virus receptor activity	0001618	1		1	0.0506022
molecular_function	xyloglucan:xyloglucosyl transferase activity	0016762	1		1	0.473201
molecular_function	zinc ion transmembrane transporter activity	0005385		1	1	0.405238
cellular_component	nucleus	0005634	46	23	69	1
cellular_component	cytoplasm	0005737	35	9	44	0.977013
cellular_component	plasma membrane	0005886	25	16	41	0.974239
cellular_component	integral component of membrane	0016021	29	11	40	0.890102
cellular_component	membrane	0016020	21	8	29	0.0272654
cellular_component	extracellular region	0005576	17	8	25	0.0576536
cellular_component	mitochondrion	0005739	14	10	24	0.950856
cellular_component	cytosol	0005829	18	5	23	0.956799
cellular_component	chloroplast	0009507	15	5	20	0.999982
cellular_component	Golgi apparatus	0005794	9	11	20	0.17721
cellular_component	cytosolic large ribosomal subunit	0022625	16		16	9.82547e-07
cellular_component	cell wall	0005618	8	6	14	0.0230499
cellular_component	extracellular exosome	0070062	13		13	8.44504e-07
cellular_component	plastid	0009536	10	3	13	0.000313246
cellular_component	cellular_component	0005575	8	4	12	0.00901077
cellular_component	intracellular membrane-bounded organelle	0043231	6	4	10	0.22019
cellular_component	endoplasmic reticulum	0005783	7	2	9	0.50847
cellular_component	focal adhesion	0005925	9		9	1.57973e-07
cellular_component	mitochondrial inner membrane	0005743	7	2	9	1.14009e-05
cellular_component	apoplast	0048046	7	1	8	0.0903853
cellular_component	cytosolic small ribosomal subunit	0022627	7		7	0.00815564
cellular_component	extracellular space	0005615	6	1	7	0.00262338
cellular_component	Golgi membrane	0000139	2	5	7	0.088945
cellular_component	nucleolus	0005730	7		7	0.292232
cellular_component	plasmodesma	0009506	6	1	7	0.989846
cellular_component	blood microparticle	0072562	6		6	7.76068e-07
cellular_component	chloroplast nucleoid	0042644	5		5	2.35101e-05
cellular_component	SCF ubiquitin ligase complex	0019005	3	2	5	0.203828
cellular_component	vacuolar membrane	0005774	5		5	0.851334
cellular_component	vacuole	0005773	3	2	5	0.848484
cellular_component	external side of plasma membrane	0009897	4		4	5.39747e-05
cellular_component	immunoglobulin complex, circulating	0042571	4		4	4.20979e-07
cellular_component	integral component of plasma membrane	0005887	2	2	4	0.745535
cellular_component	plant-type cell wall	0009505	4		4	0.472384
cellular_component	anchored component of plasma membrane	0046658	2	1	3	0.502717
cellular_component	chloroplast thylakoid	0009534	3		3	0.441167
cellular_component	chromosome	0005694	3		3	0.0598071
cellular_component	endosome	0005768	2	1	3	0.846664
cellular_component	lysosome	0005764	3		3	0.0218676
cellular_component	mitochondrial matrix	0005759	3		3	0.142148
cellular_component	peroxisome	0005777	3		3	0.564596
cellular_component	plastid-encoded plastid RNA polymerase complex	0000427	3		3	0.000263299
cellular_component	respiratory chain complex IV	0045277	3		3	0.000389926
cellular_component	trans-Golgi network	0005802	2	1	3	0.846664
cellular_component	chaperone complex	0101031	2		2	0.00172224
cellular_component	chloroplast stroma	0009570		2	2	0.996812
cellular_component	MHC class I protein complex	0042612	2		2	0.000871019
cellular_component	mitochondrial respiratory chain complex I	0005747	2		2	0.230631
cellular_component	nuclear envelope	0005635	2		2	0.205362
cellular_component	nucleoid	0009295	2		2	0.0728511
cellular_component	nucleoplasm	0005654	2		2	0.69939
cellular_component	plastid nucleoid	0042646	2		2	0.00582523
cellular_component	respiratory chain	0070469	2		2	0.0541288
cellular_component	respiratory chain complex II	0045273	1	1	2	0.00976186
cellular_component	ribosome	0005840	2		2	0.325959
cellular_component	succinate dehydrogenase complex	0045281	1	1	2	0.000871019
cellular_component	thylakoid	0009579	2		2	0.710344
cellular_component	90S preribosome	0030686	1		1	0.267778
cellular_component	acrosomal vesicle	0001669	1		1	0.0340251
cellular_component	aggresome	0016235	1		1	0.114121
cellular_component	apical plasma membrane	0016324	1		1	0.30486
cellular_component	basolateral plasma membrane	0016323	1		1	0.0340251
cellular_component	cell	0005623	1		1	0.593871
cellular_component	cell body	0044297	1		1	0.0171594
cellular_component	cell junction	0030054	1		1	0.0171594
cellular_component	cell surface	0009986	1		1	0.39484
cellular_component	centriole	0005814	1		1	0.0506022
cellular_component	chloroplast envelope	0009941	1		1	0.999198
cellular_component	chloroplast outer membrane	0009707	1		1	0.557072
cellular_component	chloroplast thylakoid membrane	0009535	1		1	0.995656
cellular_component	chromatin	0000785		1	1	0.549322
cellular_component	chromosome, centromeric region	0000775	1		1	0.292712
cellular_component	chylomicron	0042627	1		1	0.08291
cellular_component	commitment complex	0000243		1	1	0.254984
cellular_component	core mediator complex	0070847	1		1	0.144273
cellular_component	costamere	0043034	1		1	0.0171594
cellular_component	cytoplasmic ribonucleoprotein granule	0036464	1		1	0.0668955
cellular_component	cytoskeleton	0005856	1		1	0.586763
cellular_component	dendrite	0030425	1		1	0.129327
cellular_component	dimeric IgA immunoglobulin complex	0071750	1		1	0.0171594
cellular_component	DNA-directed RNA polymerase II, core complex	0005665		1	1	0.316799
cellular_component	endomembrane system	0012505	1		1	0.873215
cellular_component	endoplasmic reticulum lumen	0005788		1	1	0.384261
cellular_component	endoplasmic reticulum membrane	0005789	1		1	0.994247
cellular_component	ER body	0010168	1		1	0.0506022
cellular_component	exine	0043668	1		1	0.0506022
cellular_component	GINS complex	0000811		1	1	0.08291
cellular_component	high-density lipoprotein particle	0034364	1		1	0.0668955
cellular_component	histone deacetylase complex	0000118		1	1	0.292712
cellular_component	intermediate filament	0005882	1		1	0.0340251
cellular_component	intracellular	0005622	1		1	0.991082
cellular_component	large ribosomal subunit	0015934	1		1	0.144273
cellular_component	mitochondrial proton-transporting ATP synthase complex	0005753	1		1	0.215249
cellular_component	mitochondrial proton-transporting ATP synthase complex, catalytic core F(1)	0000275	1		1	0.0986503
cellular_component	mitochondrial respiratory chain complex II, succinate dehydrogenase complex (ubiquinone)	0005749		1	1	0.129327
cellular_component	mitochondrial respiratory chain complex IV	0005751	1		1	0.0986503
cellular_component	monomeric IgA immunoglobulin complex	0071748	1		1	0.0171594
cellular_component	nuclear cohesin complex	0000798	1		1	0.114121
cellular_component	pentameric IgM immunoglobulin complex	0071756	1		1	0.0171594
cellular_component	plant-type vacuole membrane	0009705		1	1	0.841039
cellular_component	polar nucleus	0043078		1	1	0.114121
cellular_component	pollen tube tip	0090404	1		1	0.20154
cellular_component	polysome	0005844	1		1	0.187592
cellular_component	preribosome, large subunit precursor	0030687	1		1	0.463988
cellular_component	proteasome complex	0000502	1		1	0.454615
cellular_component	proteasome core complex	0005839	1		1	0.292712
cellular_component	proton-transporting ATP synthase complex, coupling factor F(o)	0045263	1		1	0.08291
cellular_component	replication fork protection complex	0031298		1	1	0.158962
cellular_component	respiratory chain complex III	0045275	1		1	0.0506022
cellular_component	RISC complex	0016442	1		1	0.782633
cellular_component	RNA nuclear export complex	0042565	1		1	0.08291
cellular_component	sarcolemma	0042383	1		1	0.0506022
cellular_component	secretory dimeric IgA immunoglobulin complex	0071752	1		1	0.0171594
cellular_component	small-subunit processome	0032040	1		1	0.62762
cellular_component	SNARE complex	0031201	1		1	0.62762
cellular_component	spliceosomal complex	0005681	1		1	0.652593
cellular_component	terminal web	1990357	1		1	0.0171594
cellular_component	transcription factor complex	0005667	1		1	0.454615
cellular_component	U1 snRNP	0005685		1	1	0.362547
cellular_component	U2-type prespliceosome	0071004		1	1	0.362547
cellular_component	Z disc	0030018	1		1	0.0340251
biological_process	biological_process	0008150	16	5	21	1
biological_process	regulation of transcription, DNA-templated	0006355	16	5	21	0.82563
biological_process	transcription, DNA-templated	0006351	13	7	20	0.561802
biological_process	translation	0006412	19		19	4.1881e-05
biological_process	response to heat	0009408	13	2	15	5.02427e-06
biological_process	signal transduction	0007165	8	5	13	0.00729282
biological_process	defense response	0006952	8	3	11	0.659203
biological_process	oxidation-reduction process	0055114	10	1	11	0.579927
biological_process	cell wall organization	0071555	4	6	10	0.00239331
biological_process	flavonoid biosynthetic process	0009813	7	3	10	0.00487714
biological_process	flavonoid glucuronidation	0052696	6	3	9	0.00812333
biological_process	response to bacterium	0009617	4	5	9	3.17125e-05
biological_process	response to high light intensity	0009644	9		9	1.14009e-05
biological_process	response to hydrogen peroxide	0042542	9		9	1.03036e-05
biological_process	defense response to fungus	0050832	6	2	8	0.0119892
biological_process	response to cadmium ion	0046686	5	3	8	0.122422
biological_process	defense response to bacterium	0042742	5	2	7	0.16118
biological_process	cytoplasmic translation	0002181	6		6	0.000936626
biological_process	innate immune response	0045087	6		6	0.00158756
biological_process	lipid catabolic process	0016042	3	3	6	0.0156277
biological_process	protein folding	0006457	4	2	6	0.262814
biological_process	response to salt stress	0009651	5	1	6	0.54385
biological_process	RNA-dependent DNA biosynthetic process	0006278	4	2	6	2.19803e-05
biological_process	embryo development ending in seed dormancy	0009793	5		5	0.628294
biological_process	response to wounding	0009611	2	3	5	0.209896
biological_process	B cell receptor signaling pathway	0050853	4		4	4.20979e-07
biological_process	complement activation, classical pathway	0006958	4		4	4.20979e-07
biological_process	DNA integration	0015074	2	2	4	0.00325789
biological_process	lignin biosynthetic process	0009809	3	1	4	0.0417444
biological_process	phagocytosis, engulfment	0006911	4		4	4.20979e-07
biological_process	phagocytosis, recognition	0006910	4		4	4.20979e-07
biological_process	positive regulation of B cell activation	0050871	4		4	4.20979e-07
biological_process	protein phosphorylation	0006468	4		4	0.999275
biological_process	proteolysis	0006508	3	1	4	0.630572
biological_process	proteolysis involved in cellular protein catabolic process	0051603	3	1	4	0.0833551
biological_process	proton transmembrane transport	1902600	4		4	0.00293508
biological_process	regulation of transcription by RNA polymerase II	0006357	2	2	4	0.426973
biological_process	response to abscisic acid	0009737	2	2	4	0.766259
biological_process	response to desiccation	0009269	3	1	4	0.000215816
biological_process	SCF-dependent proteasomal ubiquitin-dependent protein catabolic process	0031146	2	2	4	0.295247
biological_process	secondary metabolite biosynthetic process	0044550	2	2	4	0.151692
biological_process	transmembrane transport	0055085	2	2	4	0.59555
biological_process	aerobic respiration	0009060	2	1	3	0.0087127
biological_process	cellulose biosynthetic process	0030244	1	2	3	0.0872381
biological_process	chloroplast organization	0009658	3		3	0.395477
biological_process	dephosphorylation	0016311	2	1	3	0.0418648
biological_process	DNA mediated transformation	0009294		3	3	0.017206
biological_process	DNA repair	0006281	2	1	3	0.548553
biological_process	double-strand break repair via homologous recombination	0000724	3		3	0.0491707
biological_process	glucosinolate catabolic process	0019762	3		3	0.00337741
biological_process	immune response	0006955	3		3	0.0015852
biological_process	metabolic process	0008152	3		3	0.118969
biological_process	mitochondrial translational elongation	0070125	2	1	3	0.000549959
biological_process	multicellular organism development	0007275	2	1	3	0.809783
biological_process	plant-type primary cell wall biogenesis	0009833	1	2	3	0.0271498
biological_process	positive regulation of transcription, DNA-templated	0045893	1	2	3	0.689272
biological_process	protein ubiquitination	0016567	3		3	0.886996
biological_process	response to cold	0009409	2	1	3	0.861861
biological_process	response to hormone	0009725	3		3	0.00688034
biological_process	response to jasmonic acid	0009753	1	2	3	0.15426
biological_process	response to oxidative stress	0006979	3		3	0.59182
biological_process	response to stress	0006950	1	2	3	0.0418648
biological_process	response to virus	0009615	2	1	3	0.16668
biological_process	response to water deprivation	0009414	2	1	3	0.794423
biological_process	ribosomal small subunit assembly	0000028	3		3	0.0351529
biological_process	root development	0048364	2	1	3	0.404705
biological_process	translational elongation	0006414	3		3	0.03305
biological_process	antigen processing and presentation of peptide antigen via MHC class I	0002474	2		2	0.00172224
biological_process	cell differentiation	0030154	1	1	2	0.881356
biological_process	cell division	0051301	1	1	2	0.848497
biological_process	cell redox homeostasis	0045454	2		2	0.555555
biological_process	cell surface receptor signaling pathway	0007166	1	1	2	0.680374
biological_process	cell wall organization or biogenesis	0071554	1	1	2	0.236982
biological_process	defense response to fungus, incompatible interaction	0009817	2		2	0.0828814
biological_process	ethylene-activated signaling pathway	0009873	1	1	2	0.727858
biological_process	flower development	0009908		2	2	0.724429
biological_process	gluconeogenesis	0006094	2		2	0.0828814
biological_process	glucosinolate biosynthetic process	0019761	1	1	2	0.0042085
biological_process	intracellular protein transport	0006886	2		2	0.750866
biological_process	jasmonic acid biosynthetic process	0009695	2		2	0.132332
biological_process	jasmonic acid mediated signaling pathway	0009867	1	1	2	0.319654
biological_process	lipid metabolic process	0006629	1	1	2	0.589729
biological_process	methylation	0032259	2		2	0.799873
biological_process	mitochondrial electron transport, NADH to ubiquinone	0006120	2		2	0.0455246
biological_process	mitochondrial electron transport, succinate to ubiquinone	0006121	1	1	2	0.00283783
biological_process	negative regulation of flower development	0009910	1	1	2	0.0679953
biological_process	negative regulation of transcription, DNA-templated	0045892		2	2	0.630745
biological_process	N-terminal protein amino acid acetylation	0006474	1	1	2	0.0455246
biological_process	oligosaccharide biosynthetic process	0009312	2		2	0.00172224
biological_process	oxalate metabolic process	0033609		2	2	0.0266072
biological_process	phenylpropanoid biosynthetic process	0009699	1	1	2	0.0586287
biological_process	phosphatidylcholine metabolic process	0046470	1	1	2	0.00767921
biological_process	plant-type hypersensitive response	0009626	2		2	0.313335
biological_process	polarity specification of adaxial/abaxial axis	0009944	2		2	0.0541288
biological_process	pollen development	0009555	1	1	2	0.560558
biological_process	polysaccharide biosynthetic process	0000271	1	1	2	0.126548
biological_process	positive regulation of respiratory burst	0060267	2		2	0.000871019
biological_process	positive regulation of transcription by RNA polymerase II	0045944		2	2	0.351013
biological_process	protein refolding	0042026	2		2	0.132332
biological_process	red, far-red light phototransduction	0009585	1	1	2	0.30066
biological_process	respiratory electron transport chain	0022904	1	1	2	0.0120648
biological_process	response to light stimulus	0009416	2		2	0.903576
biological_process	response to osmotic stress	0006970		2	2	0.514095
biological_process	response to red or far red light	0009639	1	1	2	0.224291
biological_process	response to temperature stimulus	0009266	2		2	0.126548
biological_process	response to unfolded protein	0006986	2		2	0.0728511
biological_process	response to UV	0009411	2		2	0.0880458
biological_process	telomere maintenance	0000723	1	1	2	0.0541288
biological_process	transmembrane receptor protein tyrosine kinase signaling pathway	0007169	2		2	0.720962
biological_process	transport	0006810	1	1	2	0.71392
biological_process	tricarboxylic acid cycle	0006099	1	1	2	0.098649
biological_process	ubiquitin-dependent protein catabolic process	0006511	2		2	0.734609
biological_process	wax biosynthetic process	0010025	2		2	0.0679953
biological_process	abaxial cell fate specification	0010158	1		1	0.144273
biological_process	abscisic acid-activated signaling pathway	0009738	1		1	0.967454
biological_process	actin filament organization	0007015	1		1	0.280353
biological_process	activation of protein kinase activity	0032147	1		1	0.0986503
biological_process	adaptive immune response	0002250	1		1	0.0171594
biological_process	aerobic electron transport chain	0019646	1		1	0.0506022
biological_process	amino acid transmembrane transport	0003333		1	1	0.712986
biological_process	angiogenesis	0001525	1		1	0.0986503
biological_process	animal organ regeneration	0031100		1	1	0.0668955
biological_process	anther development	0048653	1		1	0.316799
biological_process	antibacterial humoral response	0019731	1		1	0.0340251
biological_process	antigen processing and presentation	0019882	1		1	0.0171594
biological_process	aromatic amino acid family biosynthetic process	0009073		1	1	0.241967
biological_process	aromatic compound biosynthetic process	0019438		1	1	0.292712
biological_process	ATP biosynthetic process	0006754	1		1	0.114121
biological_process	ATP synthesis coupled proton transport	0015986	1		1	0.267778
biological_process	autophagy	0006914	1		1	0.173401
biological_process	auxin-activated signaling pathway	0009734	1		1	0.895309
biological_process	bile acid metabolic process	0008206	1		1	0.0171594
biological_process	branched-chain amino acid biosynthetic process	0009082		1	1	0.144273
biological_process	brassinosteroid biosynthetic process	0016132	1		1	0.445078
biological_process	brassinosteroid homeostasis	0010268	1		1	0.39484
biological_process	carbohydrate mediated signaling	0009756	1		1	0.0340251
biological_process	carbohydrate transmembrane transport	0034219	1		1	0.228723
biological_process	cell differentiation involved in embryonic placenta development	0060706	1		1	0.0340251
biological_process	cell fate commitment	0045165	1		1	0.114121
biological_process	cell wall biogenesis	0042546	1		1	0.549322
biological_process	cell wall thickening	0052386		1	1	0.129327
biological_process	cellular iron ion homeostasis	0006879	1		1	0.241967
biological_process	cellular manganese ion homeostasis	0030026	1		1	0.129327
biological_process	cellular phosphate ion homeostasis	0030643	1		1	0.0506022
biological_process	cellular protein metabolic process	0044267		1	1	0.158962
biological_process	cellular response to iron ion	0071281	1		1	0.328534
biological_process	cellular response to nitrogen starvation	0006995		1	1	0.280353
biological_process	cellular response to phosphate starvation	0016036		1	1	0.435375
biological_process	cellular response to potassium ion starvation	0051365		1	1	0.0506022
biological_process	cellular response to unfolded protein	0034620		1	1	0.30486
biological_process	cellulose catabolic process	0030245		1	1	0.280353
biological_process	centromeric sister chromatid cohesion	0070601	1		1	0.0340251
biological_process	chitin catabolic process	0006032		1	1	0.362547
biological_process	cholesterol biosynthetic process	0006695	1		1	0.0506022
biological_process	cholesterol efflux	0033344	1		1	0.0668955
biological_process	cholesterol homeostasis	0042632	1		1	0.0668955
biological_process	chorismate biosynthetic process	0009423		1	1	0.114121
biological_process	copulation	0007620	1		1	0.0171594
biological_process	cuticle development	0042335	1		1	0.362547
biological_process	cutin biosynthetic process	0010143	1		1	0.292712
biological_process	cytolysis	0019835	1		1	0.0171594
biological_process	defense response by callose deposition in cell wall	0052544		1	1	0.0986503
biological_process	defense response to bacterium, incompatible interaction	0009816		1	1	0.557072
biological_process	defense response to Gram-negative bacterium	0050829		1	1	0.187592
biological_process	defense response to insect	0002213		1	1	0.08291
biological_process	developmental process	0032502	1		1	0.435375
biological_process	digestion	0007586	1		1	0.0171594
biological_process	DNA recombination	0006310		1	1	0.600856
biological_process	double-strand break repair	0006302	1		1	0.473201
biological_process	double-strand break repair via break-induced replication	0000727		1	1	0.114121
biological_process	drug transmembrane transport	0006855		1	1	0.640322
biological_process	electron transport chain	0022900	1		1	0.187592
biological_process	ER overload response	0006983	1		1	0.114121
biological_process	far-red light signaling pathway	0010018	1		1	0.351404
biological_process	fructose metabolic process	0006000	1		1	0.267778
biological_process	gibberellic acid mediated signaling pathway	0009740	1		1	0.508499
biological_process	gibberellin biosynthetic process	0009686	1		1	0.241967
biological_process	glomerular filtration	0003094	1		1	0.0171594
biological_process	glucose import	0046323		1	1	0.586763
biological_process	glutathione biosynthetic process	0006750		1	1	0.0506022
biological_process	glutathione metabolic process	0006749	1		1	0.579532
biological_process	glycolytic process	0006096	1		1	0.697639
biological_process	hematopoietic progenitor cell differentiation	0002244	1		1	0.0986503
biological_process	high-density lipoprotein particle assembly	0034380	1		1	0.0668955
biological_process	histone deacetylation	0016575		1	1	0.415458
biological_process	hormone-mediated signaling pathway	0009755	1		1	0.292712
biological_process	humoral immune response	0006959	1		1	0.0171594
biological_process	hyperosmotic response	0006972	1		1	0.215249
biological_process	I-kappaB kinase/NF-kappaB signaling	0007249	1		1	0.0171594
biological_process	immunoglobulin production	0002377	1		1	0.0340251
biological_process	indole phytoalexin biosynthetic process	0009700		1	1	0.0340251
biological_process	induction of programmed cell death	0012502	1		1	0.0506022
biological_process	intracellular sequestering of iron ion	0006880	1		1	0.187592
biological_process	iron ion transport	0006826	1		1	0.144273
biological_process	isoleucine biosynthetic process	0009097		1	1	0.144273
biological_process	L-cystine transport	0015811	1		1	0.0506022
biological_process	leaf development	0048366		1	1	0.758749
biological_process	leaf morphogenesis	0009965	1		1	0.579532
biological_process	leucine biosynthetic process	0009098		1	1	0.129327
biological_process	lignan biosynthetic process	0009807		1	1	0.129327
biological_process	lipid transport	0006869	1		1	0.697639
biological_process	lipoprotein metabolic process	0042157	1		1	0.129327
biological_process	liver development	0001889		1	1	0.0171594
biological_process	maintenance of shoot apical meristem identity	0010492	1		1	0.254984
biological_process	manganese ion transmembrane transport	0071421	1		1	0.114121
biological_process	maturation of LSU-rRNA	0000470	1		1	0.373498
biological_process	maturation of LSU-rRNA from tricistronic rRNA transcript (SSU-rRNA, 5.8S rRNA, LSU-rRNA)	0000463	1		1	0.228723
biological_process	menthol biosynthetic process	0031525	1		1	0.0506022
biological_process	meristem maintenance	0010073	1		1	0.30486
biological_process	miRNA export from nucleus	0061716	1		1	0.0668955
biological_process	mitochondrial electron transport, ubiquinol to cytochrome c	0006122	1		1	0.20154
biological_process	mitochondria-nucleus signaling pathway	0031930	1		1	0.114121
biological_process	mitotic DNA replication initiation	1902975		1	1	0.0340251
biological_process	mRNA 5'-splice site recognition	0000395		1	1	0.129327
biological_process	mRNA splicing, via spliceosome	0000398	1		1	0.820463
biological_process	multidimensional cell growth	0009825		1	1	0.384261
biological_process	negative regulation of apoptotic process	0043066	1		1	0.254984
biological_process	negative regulation of calcium ion import	0090281	1		1	0.0171594
biological_process	negative regulation of defense response	0031348	1		1	0.292712
biological_process	negative regulation of ethylene-activated signaling pathway	0010105		1	1	0.340068
biological_process	negative regulation of nitric oxide mediated signal transduction	0010751	1		1	0.0171594
biological_process	negative regulation of peptidase activity	0010466	1		1	0.0340251
biological_process	negative regulation of peptidyl-tyrosine phosphorylation	0050732	1		1	0.0171594
biological_process	negative regulation of programmed cell death	0043069	1		1	0.30486
biological_process	negative regulation of serine-type endopeptidase activity	1900004	1		1	0.0171594
biological_process	negative regulation of short-day photoperiodism, flowering	0048577		1	1	0.144273
biological_process	negative regulation of sinapate ester biosynthetic process	1903086		1	1	0.0668955
biological_process	negative regulation of transcription by RNA polymerase II	0000122		1	1	0.435375
biological_process	neuron projection regeneration	0031102	1		1	0.0506022
biological_process	nodulation	0009877	1		1	0.173401
biological_process	Notch signaling pathway	0007219	1		1	0.08291
biological_process	N-terminal peptidyl-methionine acetylation	0017196		1	1	0.499902
biological_process	oligopeptide transport	0006857		1	1	0.712986
biological_process	one-carbon metabolic process	0006730	1		1	0.280353
biological_process	ovulation from ovarian follicle	0001542		1	1	0.0171594
biological_process	oxidative phosphorylation	0006119	1		1	0.0506022
biological_process	oxylipin biosynthetic process	0031408	1		1	0.473201
biological_process	pancreas development	0031016		1	1	0.0171594
biological_process	pattern specification process	0007389	1		1	0.158962
biological_process	pentose-phosphate shunt	0006098	1		1	0.173401
biological_process	peptide catabolic process	0043171	1		1	0.173401
biological_process	peptidyl-methionine modification	0018206	1		1	0.0506022
biological_process	phloem development	0010088	1		1	0.241967
biological_process	phospholipid catabolic process	0009395		1	1	0.114121
biological_process	phospholipid dephosphorylation	0046839	1		1	0.114121
biological_process	phospholipid efflux	0033700	1		1	0.0668955
biological_process	phospholipid metabolic process	0006644	1		1	0.215249
biological_process	photorespiration	0009853	1		1	0.373498
biological_process	plant-type cell wall biogenesis	0009832		1	1	0.614469
biological_process	plant-type cell wall organization or biogenesis	0071669		1	1	0.20154
biological_process	plant-type secondary cell wall biogenesis	0009834		1	1	0.646511
biological_process	plasmodesmata-mediated intercellular transport	0010497		1	1	0.144273
biological_process	pollen tube guidance	0010183	1		1	0.351404
biological_process	positive regulation of abscisic acid biosynthetic process	0010116		1	1	0.129327
biological_process	positive regulation of abscisic acid-activated signaling pathway	0009789	1		1	0.435375
biological_process	positive regulation of autophagy	0010508	1		1	0.144273
biological_process	positive regulation of cholesterol esterification	0010873	1		1	0.0668955
biological_process	positive regulation of circadian rhythm	0042753	1		1	0.405238
biological_process	positive regulation of cytokine production involved in inflammatory response	1900017	1		1	0.0171594
biological_process	positive regulation of fatty acid biosynthetic process	0045723	1		1	0.158962
biological_process	positive regulation of inflammatory response	0050729	1		1	0.0171594
biological_process	positive regulation of lipoprotein lipase activity	0051006	1		1	0.0340251
biological_process	positive regulation of nitrogen utilization	0045848		1	1	0.0340251
biological_process	positive regulation of programmed cell death	0043068		1	1	0.173401
biological_process	positive regulation of protein kinase activity	0045860	1		1	0.0668955
biological_process	positive regulation of protein oligomerization	0032461	1		1	0.0171594
biological_process	positive regulation of protein targeting to mitochondrion	1903955	1		1	0.0171594
biological_process	positive regulation of transcription initiation from RNA polymerase II promoter	0060261	1		1	0.08291
biological_process	positive regulation of transferase activity	0051347	1		1	0.0506022
biological_process	positive regulation of translation	0045727	1		1	0.254984
biological_process	positive regulation of triglyceride catabolic process	0010898	1		1	0.0340251
biological_process	post-embryonic development	0009791		1	1	0.516948
biological_process	post-translational protein modification	0043687		1	1	0.187592
biological_process	production of siRNA involved in RNA interference	0030422	1		1	0.866421
biological_process	progesterone metabolic process	0042448		1	1	0.0171594
biological_process	proteasomal protein catabolic process	0010498	1		1	0.0506022
biological_process	proteasome-mediated ubiquitin-dependent protein catabolic process	0043161		1	1	0.966297
biological_process	protein catabolic process	0030163	1		1	0.750219
biological_process	protein deubiquitination	0016579	1		1	0.586763
biological_process	protein glutathionylation	0010731	1		1	0.0506022
biological_process	protein glycosylation	0006486		1	1	0.766988
biological_process	protein import into mitochondrial inner membrane	0045039		1	1	0.08291
biological_process	protein insertion into membrane	0051205		1	1	0.08291
biological_process	protein oxidation	0018158	1		1	0.0506022
biological_process	protein polyubiquitination	0000209		1	1	0.67022
biological_process	protein transport	0015031		1	1	0.955437
biological_process	red or far-red light signaling pathway	0010017	1		1	0.405238
biological_process	regulation of acrosome reaction	0060046	1		1	0.0171594
biological_process	regulation of autophagy of mitochondrion	1903146	1		1	0.0171594
biological_process	regulation of cellular respiration	0043457	1		1	0.0668955
biological_process	regulation of gene expression	0010468	1		1	0.804158
biological_process	regulation of intestinal cholesterol absorption	0030300	1		1	0.0506022
biological_process	regulation of leaf development	2000024	1		1	0.144273
biological_process	regulation of phenylpropanoid metabolic process	2000762		1	1	0.20154
biological_process	regulation of protein export from nucleus	0046825	1		1	0.114121
biological_process	regulation of root development	2000280		1	1	0.187592
biological_process	regulation of shoot apical meristem development	1902183	1		1	0.129327
biological_process	regulation of store-operated calcium entry	2001256	1		1	0.0171594
biological_process	removal of superoxide radicals	0019430	1		1	0.187592
biological_process	respiratory chain complex IV assembly	0008535	1		1	0.0986503
biological_process	response to cytokinin	0009735	1		1	0.889695
biological_process	response to drug	0042493	1		1	0.173401
biological_process	response to estrogen	0043627	1		1	0.0340251
biological_process	response to external biotic stimulus	0043207	1		1	0.0506022
biological_process	response to freezing	0050826		1	1	0.173401
biological_process	response to fungus	0009620	1		1	0.454615
biological_process	response to gibberellin	0009739	1		1	0.634026
biological_process	response to light intensity	0009642	1		1	0.158962
biological_process	response to nematode	0009624		1	1	0.445078
biological_process	response to organic substance	0010033		1	1	0.0668955
biological_process	response to ozone	0010193		1	1	0.328534
biological_process	response to salicylic acid	0009751		1	1	0.817314
biological_process	response to UV-B	0010224		1	1	0.646511
biological_process	retina homeostasis	0001895	1		1	0.0986503
biological_process	reverse cholesterol transport	0043691	1		1	0.0668955
biological_process	ribosomal large subunit assembly	0000027	1		1	0.557072
biological_process	ribosomal large subunit export from nucleus	0000055	1		1	0.187592
biological_process	ribosomal small subunit biogenesis	0042274	1		1	0.228723
biological_process	RNA interference	0016246	1		1	0.08291
biological_process	RNA modification	0009451	1		1	0.964484
biological_process	root meristem growth	0010449	1		1	0.241967
biological_process	rRNA processing	0006364	1		1	0.745842
biological_process	salicylic acid mediated signaling pathway	0009863		1	1	0.351404
biological_process	sarcomere organization	0045214	1		1	0.0171594
biological_process	seedling development	0090351	1		1	0.20154
biological_process	sexual reproduction	0019953		1	1	0.215249
biological_process	shoot system development	0048367	1		1	0.586763
biological_process	signal transduction involved in regulation of gene expression	0023019	1		1	0.0171594
biological_process	sister chromatid cohesion	0007062	1		1	0.241967
biological_process	SMAD protein signal transduction	0060395		1	1	0.0340251
biological_process	spindle assembly	0051225	1		1	0.129327
biological_process	starch biosynthetic process	0019252	1		1	0.425502
biological_process	stem cell population maintenance	0019827	1		1	0.158962
biological_process	sterol metabolic process	0016125	1		1	0.491155
biological_process	stomatal lineage progression	0010440		1	1	0.08291
biological_process	symbiont process	0044403		1	1	0.0171594
biological_process	triglyceride catabolic process	0019433	1		1	0.0506022
biological_process	triglyceride homeostasis	0070328	1		1	0.0506022
biological_process	UDP-N-acetylglucosamine biosynthetic process	0006048		1	1	0.114121
biological_process	UV protection	0009650	1		1	0.08291
biological_process	vacuolar protein processing	0006624		1	1	0.0668955
biological_process	valine biosynthetic process	0009099		1	1	0.0986503
biological_process	vegetative to reproductive phase transition of meristem	0010228	1		1	0.750219
biological_process	very long-chain fatty acid biosynthetic process	0042761	1		1	0.187592
biological_process	very long-chain fatty acid metabolic process	0000038	1		1	0.241967
biological_process	very-low-density lipoprotein particle remodeling	0034372	1		1	0.0340251
biological_process	vesicle docking	0048278	1		1	0.362547
biological_process	vesicle fusion	0006906	1		1	0.508499
biological_process	viral entry into host cell	0046718	1		1	0.0506022
biological_process	xyloglucan metabolic process	0010411	1		1	0.541438
biological_process	zinc II ion transmembrane transport	0071577		1	1	0.187592

## Sheet: Table S5
Table S5. KEGG pathway annotation of DEGs between two cultivars of M. ruthenica stems
Ontology	Class	GO ID	No. of up-regulation unigenes	No. of down-regulation unigenes	Total	Pvalue
molecular_function	protein binding	0005515	21	13	34	0.925552
molecular_function	molecular_function	0003674	21	10	31	0.994183
molecular_function	structural constituent of ribosome	0003735	26		26	3.34682e-07
molecular_function	DNA binding	0003677	15	5	20	0.767522
molecular_function	metal ion binding	0046872	15	4	19	0.544499
molecular_function	DNA binding transcription factor activity	0003700	11	7	18	0.767958
molecular_function	ATP binding	0005524	6	7	13	0.995858
molecular_function	RNA binding	0003723	11	2	13	0.724638
molecular_function	quercetin 3-O-glucosyltransferase activity	0080043	6	3	9	0.0058904
molecular_function	quercetin 7-O-glucosyltransferase activity	0080044	6	3	9	0.0058904
molecular_function	RNA polymerase II regulatory region sequence-specific DNA binding	0000977	3	6	9	0.00416382
molecular_function	zinc ion binding	0008270	6	3	9	0.891722
molecular_function	dioxygenase activity	0051213	5	2	7	0.00159616
molecular_function	hydrolase activity	0016787	3	4	7	0.428209
molecular_function	kinase activity	0016301	6	1	7	0.941084
molecular_function	RNA-directed DNA polymerase activity	0003964	5	2	7	1.24659e-05
molecular_function	transferase activity, transferring glycosyl groups	0016757	1	6	7	0.252513
molecular_function	ADP binding	0043531	3	3	6	0.209665
molecular_function	antigen binding	0003823	5		5	8.57398e-09
molecular_function	copper ion binding	0005507	2	3	5	0.0793649
molecular_function	cysteine-type endopeptidase activity	0004197	3	2	5	0.00178086
molecular_function	electron transfer activity	0009055	4	1	5	0.0324058
molecular_function	immunoglobulin receptor binding	0034987	5		5	8.57398e-09
molecular_function	protein dimerization activity	0046983	2	3	5	0.0680357
molecular_function	protein homodimerization activity	0042803	5		5	0.138966
molecular_function	2 iron, 2 sulfur cluster binding	0051537	3	1	4	0.00436957
molecular_function	acid phosphatase activity	0003993	3	1	4	0.00674479
molecular_function	ATPase activity, coupled to transmembrane movement of substances	0042626	2	2	4	0.322295
molecular_function	calcium ion binding	0005509	3	1	4	0.512793
molecular_function	carboxylic ester hydrolase activity	0052689	2	2	4	0.161411
molecular_function	hydrolase activity, hydrolyzing O-glycosyl compounds	0004553	2	2	4	0.28757
molecular_function	linoleate 13S-lipoxygenase activity	0016165	4		4	0.000405277
molecular_function	monooxygenase activity	0004497	3	1	4	0.064891
molecular_function	NADH dehydrogenase (ubiquinone) activity	0008137	4		4	0.00144341
molecular_function	oxidoreductase activity, acting on paired donors, with incorporation or reduction of molecular oxygen, NAD(P)H as one donor, and incorporation of one atom of oxygen	0016709	2	2	4	0.148504
molecular_function	protein self-association	0043621	3	1	4	0.0185222
molecular_function	rRNA binding	0019843	4		4	0.022993
molecular_function	serine-type endopeptidase inhibitor activity	0004867	4		4	0.000131896
molecular_function	ubiquitin-protein transferase activity	0004842	2	2	4	0.879004
molecular_function	ATP-dependent 3'-5' DNA helicase activity	0043140	3		3	0.017206
molecular_function	beta-glucosidase activity	0008422	3		3	0.0442349
molecular_function	catalytic activity	0003824	1	2	3	0.704708
molecular_function	cellulose synthase (UDP-forming) activity	0016760	1	2	3	0.0543634
molecular_function	cellulose synthase activity	0016759	1	2	3	0.0684302
molecular_function	cytochrome-c oxidase activity	0004129	3		3	0.00605903
molecular_function	four-way junction helicase activity	0009378	3		3	0.0157897
molecular_function	glucomannan 4-beta-mannosyltransferase activity	0047259		3	3	0.000263299
molecular_function	heme binding	0020037	3		3	0.250741
molecular_function	mannan synthase activity	0051753		3	3	0.0087127
molecular_function	mRNA binding	0003729	3		3	0.833862
molecular_function	oxidoreductase activity	0016491	3		3	0.742091
molecular_function	oxidoreductase activity, oxidizing metal ions	0016722		3	3	0.0290481
molecular_function	phosphatase activity	0016791	2	1	3	0.0491707
molecular_function	protein serine/threonine kinase activity	0004674	2	1	3	0.999958
molecular_function	transcription regulatory region DNA binding	0044212		3	3	0.794423
molecular_function	translation elongation factor activity	0003746	2	1	3	0.104382
molecular_function	transporter activity	0005215	2	1	3	0.584155
molecular_function	3 iron, 4 sulfur cluster binding	0051538	1	1	2	0.00172224
molecular_function	4 iron, 4 sulfur cluster binding	0051539	1	1	2	0.156024
molecular_function	arsenate reductase (glutaredoxin) activity	0008794	2		2	0.00976186
molecular_function	calmodulin binding	0005516	2		2	0.772183
molecular_function	carbohydrate binding	0030246	2		2	0.503338
molecular_function	chitinase activity	0004568	1	1	2	0.0880458
molecular_function	chromatin binding	0003682	1	1	2	0.750866
molecular_function	cinnamyl-alcohol dehydrogenase activity	0045551	2		2	0.0336977
molecular_function	codeinone reductase (NADPH) activity	0047036	2		2	0.00283783
molecular_function	enzyme inhibitor activity	0004857	2		2	0.0455246
molecular_function	galactinol-raffinose galactosyltransferase activity	0047268	2		2	0.000871019
molecular_function	glutathione transferase activity	0004364	2		2	0.236982
molecular_function	GTPase activity	0003924	1	1	2	0.844374
molecular_function	guiding stereospecific synthesis activity	0042349	1	1	2	0.0266072
molecular_function	iron ion binding	0005506	2		2	0.351013
molecular_function	large ribosomal subunit rRNA binding	0070180	2		2	0.0497589
molecular_function	lipid binding	0008289	2		2	0.555555
molecular_function	methionine adenosyltransferase activity	0004478	1	1	2	0.0202154
molecular_function	N-acetyltransferase activity	0008080	1	1	2	0.0172994
molecular_function	nucleic acid binding	0003676	2		2	0.975921
molecular_function	nucleotide binding	0000166	2		2	0.783638
molecular_function	nutrient reservoir activity	0045735	1	1	2	0.0300686
molecular_function	O-acetyltransferase activity	0016413	1	1	2	0.243342
molecular_function	oxalate decarboxylase activity	0046564		2	2	0.0266072
molecular_function	peptidase activity	0008233	2		2	0.30066
molecular_function	phosphatidylcholine binding	0031210	2		2	0.00283783
molecular_function	polygalacturonase inhibitor activity	0090353	2		2	0.00172224
molecular_function	polysaccharide binding	0030247	1	1	2	0.394028
molecular_function	protein binding involved in protein folding	0044183	2		2	0.186625
molecular_function	protein disulfide oxidoreductase activity	0015035	2		2	0.387958
molecular_function	protein serine/threonine phosphatase activity	0004722	2		2	0.64369
molecular_function	S-adenosylmethionine-dependent methyltransferase activity	0008757	1	1	2	0.580168
molecular_function	sequence-specific DNA binding	0043565		2	2	0.999043
molecular_function	sinapyl alcohol dehydrogenase activity	0052747	2		2	0.0266072
molecular_function	succinate dehydrogenase (ubiquinone) activity	0008177	1	1	2	0.00283783
molecular_function	succinate dehydrogenase activity	0000104	1	1	2	0.00172224
molecular_function	superoxide dismutase activity	0004784	2		2	0.0120648
molecular_function	transcription regulatory region sequence-specific DNA binding	0000976		2	2	0.0880458
molecular_function	transferase activity	0016740	2		2	0.760204
molecular_function	transferase activity, transferring acyl groups	0016746	1	1	2	0.150025
molecular_function	transferase activity, transferring acyl groups other than amino-acyl groups	0016747	2		2	0.205362
molecular_function	ubiquitin protein ligase binding	0031625	2		2	0.612922
molecular_function	unfolded protein binding	0051082	2		2	0.418026
molecular_function	12-oxophytodienoate reductase activity	0016629	1		1	0.0340251
molecular_function	3'-5' DNA helicase activity	0043138		1	1	0.114121
molecular_function	3-deoxy-7-phosphoheptulonate synthase activity	0003849		1	1	0.0340251
molecular_function	actin monomer binding	0003785	1		1	0.129327
molecular_function	allene-oxide cyclase activity	0046423	1		1	0.0340251
molecular_function	amino acid binding	0016597		1	1	0.129327
molecular_function	amino acid transmembrane transporter activity	0015171		1	1	0.736858
molecular_function	antiporter activity	0015297	1		1	0.454615
molecular_function	aryl-alcohol dehydrogenase (NADP+) activity	0047681	1		1	0.0171594
molecular_function	aspartic-type endopeptidase activity	0004190	1		1	0.722784
molecular_function	ATPase activity	0016887	1		1	0.950519
molecular_function	ATP-dependent RNA helicase activity	0004004	1		1	0.83825
molecular_function	benzoate-CoA ligase activity	0018858	1		1	0.0171594
molecular_function	beta-galactosidase activity	0004565		1	1	0.328534
molecular_function	bile acid binding	0032052	1		1	0.0171594
molecular_function	branched-chain-amino-acid transaminase activity	0004084		1	1	0.08291
molecular_function	caffeoyl-CoA O-methyltransferase activity	0042409	1		1	0.0506022
molecular_function	carbohydrate:proton symporter activity	0005351		1	1	0.686956
molecular_function	carveol dehydrogenase activity	0018459	1		1	0.0506022
molecular_function	cellulase activity	0008810		1	1	0.280353
molecular_function	chaperone binding	0051087	1		1	0.435375
molecular_function	chitin binding	0008061		1	1	0.405238
molecular_function	cholesterol binding	0015485	1		1	0.08291
molecular_function	cholesterol transporter activity	0017127	1		1	0.0668955
molecular_function	clathrin binding	0030276	1		1	0.340068
molecular_function	copper-transporting ATPase activity	0043682		1	1	0.114121
molecular_function	CTPase activity	0043273	1		1	0.0340251
molecular_function	dihydrofolate synthase activity	0008841	1		1	0.0668955
molecular_function	DNA helicase activity	0003678		1	1	0.292712
molecular_function	endopeptidase activity	0004175	1		1	0.405238
molecular_function	ent-kaurenoate oxidase activity	0051777	1		1	0.0668955
molecular_function	enzyme binding	0019899	1		1	0.215249
molecular_function	ferric iron binding	0008199	1		1	0.173401
molecular_function	fibroblast growth factor binding	0017134	1		1	0.0506022
molecular_function	flavonol-3-O-glucoside L-rhamnosyltransferase activity	0047230	1		1	0.0506022
molecular_function	fructokinase activity	0008865	1		1	0.215249
molecular_function	fructose-bisphosphate aldolase activity	0004332	1		1	0.173401
molecular_function	galactolipase activity	0047714	1		1	0.0986503
molecular_function	glucose transmembrane transporter activity	0005355		1	1	0.586763
molecular_function	glutamate-cysteine ligase activity	0004357		1	1	0.0340251
molecular_function	GTP binding	0005525	1		1	0.953042
molecular_function	high-density lipoprotein particle receptor binding	0070653	1		1	0.0506022
molecular_function	histone deacetylase activity	0004407		1	1	0.351404
molecular_function	hydrolase activity, acting on ester bonds	0016788	1		1	0.762904
molecular_function	hydrolase activity, acting on glycosyl bonds	0016798	1		1	0.572174
molecular_function	identical protein binding	0042802	1		1	0.859263
molecular_function	IgA binding	0019862	1		1	0.0506022
molecular_function	iron ion transmembrane transporter activity	0005381	1		1	0.158962
molecular_function	isoliquiritigenin 2'-O-methyltransferase activity	0033802		1	1	0.0171594
molecular_function	isopiperitenol dehydrogenase activity	0018458	1		1	0.0506022
molecular_function	L-amino acid transmembrane transporter activity	0015179	1		1	0.228723
molecular_function	L-cystine transmembrane transporter activity	0015184	1		1	0.0506022
molecular_function	licodione 2'-O-methyltransferase activity	0030751		1	1	0.0171594
molecular_function	lipase activity	0016298		1	1	0.541438
molecular_function	L-isoleucine transaminase activity	0052656		1	1	0.0506022
molecular_function	L-leucine transaminase activity	0052654		1	1	0.0506022
molecular_function	L-valine transaminase activity	0052655		1	1	0.0506022
molecular_function	lysozyme activity	0003796	1		1	0.0171594
molecular_function	malate transmembrane transporter activity	0015140		1	1	0.187592
molecular_function	manganese ion binding	0030145	1		1	0.228723
molecular_function	manganese ion transmembrane transporter activity	0005384	1		1	0.144273
molecular_function	mannitol dehydrogenase activity	0046029	1		1	0.0171594
molecular_function	metalloaminopeptidase activity	0070006	1		1	0.144273
molecular_function	microtubule binding	0008017	1		1	0.702844
molecular_function	microtubule motor activity	0003777	1		1	0.745842
molecular_function	N-acylphosphatidylethanolamine-specific phospholipase D activity	0070290		1	1	0.173401
molecular_function	NADPH dehydrogenase activity	0003959	1		1	0.173401
molecular_function	naringenin-chalcone synthase activity	0016210	1		1	0.129327
molecular_function	nuclear export signal receptor activity	0005049	1		1	0.20154
molecular_function	nucleoside-diphosphatase activity	0017110	1		1	0.0668955
molecular_function	nucleotidase activity	0008252		1	1	0.08291
molecular_function	O-methyltransferase activity	0008171		1	1	0.362547
molecular_function	oxidoreductase activity, acting on NAD(P)H, oxygen as acceptor	0050664		1	1	0.08291
molecular_function	oxidoreductase activity, acting on paired donors, with incorporation or reduction of molecular oxygen	0016705	1		1	0.340068
molecular_function	oxygen binding	0019825	1		1	0.445078
molecular_function	peptidase inhibitor activity	0030414	1		1	0.144273
molecular_function	peptide alpha-N-acetyltransferase activity	0004596		1	1	0.600856
molecular_function	peptide antigen binding	0042605	1		1	0.0171594
molecular_function	peptide binding	0042277	1		1	0.173401
molecular_function	peptidoglycan binding	0042834	1		1	0.0340251
molecular_function	peptidyl-prolyl cis-trans isomerase activity	0003755	1		1	0.727557
molecular_function	peroxidase activity	0004601	1		1	0.793676
molecular_function	phenylcoumaran benzylic ether reductase activity	0032442		1	1	0.08291
molecular_function	phosphatidate phosphatase activity	0008195	1		1	0.215249
molecular_function	phosphatidylcholine 1-acylhydrolase activity	0008970	1		1	0.129327
molecular_function	phosphatidylcholine-sterol O-acyltransferase activator activity	0060228	1		1	0.0668955
molecular_function	phosphatidylinositol binding	0035091		1	1	0.600856
molecular_function	phosphoenolpyruvate carboxykinase (ATP) activity	0004612	1		1	0.0506022
molecular_function	phosphoenolpyruvate carboxylase activity	0008964	1		1	0.20154
molecular_function	phospholipase activity	0004620	1		1	0.158962
molecular_function	phospholipase D activity	0004630		1	1	0.173401
molecular_function	P-P-bond-hydrolysis-driven protein transmembrane transporter activity	0015450		1	1	0.20154
molecular_function	pre-mRNA 5'-splice site binding	0030627		1	1	0.114121
molecular_function	protein heterodimerization activity	0046982		1	1	0.712986
molecular_function	protein kinase activator activity	0030295	1		1	0.0986503
molecular_function	protein kinase activity	0004672	1		1	0.988996
molecular_function	protein kinase binding	0019901	1		1	0.454615
molecular_function	protein serine/threonine/tyrosine kinase activity	0004712	1		1	0.607722
molecular_function	proton transmembrane transporter activity	0015078	1		1	0.08291
molecular_function	proximal promoter sequence-specific DNA binding	0000987		1	1	0.187592
molecular_function	Ran GTPase binding	0008536		1	1	0.425502
molecular_function	ribonuclease III activity	0004525	1		1	0.793676
molecular_function	ribosomal large subunit binding	0043023	1		1	0.158962
molecular_function	RNA polymerase II activity	0001055		1	1	0.241967
molecular_function	RNA polymerase II transcription factor activity, sequence-specific DNA binding	0000981		1	1	0.866421
molecular_function	serine-type endopeptidase activity	0004252		1	1	0.913561
molecular_function	single-stranded DNA binding	0003697	1		1	0.722784
molecular_function	SNAP receptor activity	0005484	1		1	0.586763
molecular_function	SNARE binding	0000149	1		1	0.600856
molecular_function	structural constituent of muscle	0008307	1		1	0.0340251
molecular_function	structural molecule activity	0005198	1		1	0.634026
molecular_function	sucrose 1F-fructosyltransferase activity	0050306	1		1	0.0340251
molecular_function	tetrahydrofolylpolyglutamate synthase activity	0004326	1		1	0.0668955
molecular_function	thiol-dependent ubiquitin-specific protease activity	0004843	1		1	0.579532
molecular_function	thiol-dependent ubiquitinyl hydrolase activity	0036459	1		1	0.445078
molecular_function	threonine-type endopeptidase activity	0004298	1		1	0.30486
molecular_function	transcription coactivator activity	0003713	1		1	0.564689
molecular_function	transcription factor activity, RNA polymerase II transcription factor recruiting	0001135		1	1	0.717927
molecular_function	transcriptional activator activity, RNA polymerase II transcription regulatory region sequence-specific DNA binding	0001228		1	1	0.692344
molecular_function	transmembrane receptor protein serine/threonine kinase activity	0004675	1		1	0.875402
molecular_function	transmembrane transporter activity	0022857		1	1	0.891599
molecular_function	triglyceride lipase activity	0004806	1		1	0.454615
molecular_function	ubiquinol-cytochrome-c reductase activity	0008121	1		1	0.173401
molecular_function	ubiquitin protein ligase activity	0061630		1	1	0.984106
molecular_function	UDP-N-acetylglucosamine diphosphorylase activity	0003977		1	1	0.08291
molecular_function	virus receptor activity	0001618	1		1	0.0506022
molecular_function	xyloglucan:xyloglucosyl transferase activity	0016762	1		1	0.473201
molecular_function	zinc ion transmembrane transporter activity	0005385		1	1	0.405238
cellular_component	nucleus	0005634	46	23	69	1
cellular_component	cytoplasm	0005737	35	9	44	0.977013
cellular_component	plasma membrane	0005886	25	16	41	0.974239
cellular_component	integral component of membrane	0016021	29	11	40	0.890102
cellular_component	membrane	0016020	21	8	29	0.0272654
cellular_component	extracellular region	0005576	17	8	25	0.0576536
cellular_component	mitochondrion	0005739	14	10	24	0.950856
cellular_component	cytosol	0005829	18	5	23	0.956799
cellular_component	chloroplast	0009507	15	5	20	0.999982
cellular_component	Golgi apparatus	0005794	9	11	20	0.17721
cellular_component	cytosolic large ribosomal subunit	0022625	16		16	9.82547e-07
cellular_component	cell wall	0005618	8	6	14	0.0230499
cellular_component	extracellular exosome	0070062	13		13	8.44504e-07
cellular_component	plastid	0009536	10	3	13	0.000313246
cellular_component	cellular_component	0005575	8	4	12	0.00901077
cellular_component	intracellular membrane-bounded organelle	0043231	6	4	10	0.22019
cellular_component	endoplasmic reticulum	0005783	7	2	9	0.50847
cellular_component	focal adhesion	0005925	9		9	1.57973e-07
cellular_component	mitochondrial inner membrane	0005743	7	2	9	1.14009e-05
cellular_component	apoplast	0048046	7	1	8	0.0903853
cellular_component	cytosolic small ribosomal subunit	0022627	7		7	0.00815564
cellular_component	extracellular space	0005615	6	1	7	0.00262338
cellular_component	Golgi membrane	0000139	2	5	7	0.088945
cellular_component	nucleolus	0005730	7		7	0.292232
cellular_component	plasmodesma	0009506	6	1	7	0.989846
cellular_component	blood microparticle	0072562	6		6	7.76068e-07
cellular_component	chloroplast nucleoid	0042644	5		5	2.35101e-05
cellular_component	SCF ubiquitin ligase complex	0019005	3	2	5	0.203828
cellular_component	vacuolar membrane	0005774	5		5	0.851334
cellular_component	vacuole	0005773	3	2	5	0.848484
cellular_component	external side of plasma membrane	0009897	4		4	5.39747e-05
cellular_component	immunoglobulin complex, circulating	0042571	4		4	4.20979e-07
cellular_component	integral component of plasma membrane	0005887	2	2	4	0.745535
cellular_component	plant-type cell wall	0009505	4		4	0.472384
cellular_component	anchored component of plasma membrane	0046658	2	1	3	0.502717
cellular_component	chloroplast thylakoid	0009534	3		3	0.441167
cellular_component	chromosome	0005694	3		3	0.0598071
cellular_component	endosome	0005768	2	1	3	0.846664
cellular_component	lysosome	0005764	3		3	0.0218676
cellular_component	mitochondrial matrix	0005759	3		3	0.142148
cellular_component	peroxisome	0005777	3		3	0.564596
cellular_component	plastid-encoded plastid RNA polymerase complex	0000427	3		3	0.000263299
cellular_component	respiratory chain complex IV	0045277	3		3	0.000389926
cellular_component	trans-Golgi network	0005802	2	1	3	0.846664
cellular_component	chaperone complex	0101031	2		2	0.00172224
cellular_component	chloroplast stroma	0009570		2	2	0.996812
cellular_component	MHC class I protein complex	0042612	2		2	0.000871019
cellular_component	mitochondrial respiratory chain complex I	0005747	2		2	0.230631
cellular_component	nuclear envelope	0005635	2		2	0.205362
cellular_component	nucleoid	0009295	2		2	0.0728511
cellular_component	nucleoplasm	0005654	2		2	0.69939
cellular_component	plastid nucleoid	0042646	2		2	0.00582523
cellular_component	respiratory chain	0070469	2		2	0.0541288
cellular_component	respiratory chain complex II	0045273	1	1	2	0.00976186
cellular_component	ribosome	0005840	2		2	0.325959
cellular_component	succinate dehydrogenase complex	0045281	1	1	2	0.000871019
cellular_component	thylakoid	0009579	2		2	0.710344
cellular_component	90S preribosome	0030686	1		1	0.267778
cellular_component	acrosomal vesicle	0001669	1		1	0.0340251
cellular_component	aggresome	0016235	1		1	0.114121
cellular_component	apical plasma membrane	0016324	1		1	0.30486
cellular_component	basolateral plasma membrane	0016323	1		1	0.0340251
cellular_component	cell	0005623	1		1	0.593871
cellular_component	cell body	0044297	1		1	0.0171594
cellular_component	cell junction	0030054	1		1	0.0171594
cellular_component	cell surface	0009986	1		1	0.39484
cellular_component	centriole	0005814	1		1	0.0506022
cellular_component	chloroplast envelope	0009941	1		1	0.999198
cellular_component	chloroplast outer membrane	0009707	1		1	0.557072
cellular_component	chloroplast thylakoid membrane	0009535	1		1	0.995656
cellular_component	chromatin	0000785		1	1	0.549322
cellular_component	chromosome, centromeric region	0000775	1		1	0.292712
cellular_component	chylomicron	0042627	1		1	0.08291
cellular_component	commitment complex	0000243		1	1	0.254984
cellular_component	core mediator complex	0070847	1		1	0.144273
cellular_component	costamere	0043034	1		1	0.0171594
cellular_component	cytoplasmic ribonucleoprotein granule	0036464	1		1	0.0668955
cellular_component	cytoskeleton	0005856	1		1	0.586763
cellular_component	dendrite	0030425	1		1	0.129327
cellular_component	dimeric IgA immunoglobulin complex	0071750	1		1	0.0171594
cellular_component	DNA-directed RNA polymerase II, core complex	0005665		1	1	0.316799
cellular_component	endomembrane system	0012505	1		1	0.873215
cellular_component	endoplasmic reticulum lumen	0005788		1	1	0.384261
cellular_component	endoplasmic reticulum membrane	0005789	1		1	0.994247
cellular_component	ER body	0010168	1		1	0.0506022
cellular_component	exine	0043668	1		1	0.0506022
cellular_component	GINS complex	0000811		1	1	0.08291
cellular_component	high-density lipoprotein particle	0034364	1		1	0.0668955
cellular_component	histone deacetylase complex	0000118		1	1	0.292712
cellular_component	intermediate filament	0005882	1		1	0.0340251
cellular_component	intracellular	0005622	1		1	0.991082
cellular_component	large ribosomal subunit	0015934	1		1	0.144273
cellular_component	mitochondrial proton-transporting ATP synthase complex	0005753	1		1	0.215249
cellular_component	mitochondrial proton-transporting ATP synthase complex, catalytic core F(1)	0000275	1		1	0.0986503
cellular_component	mitochondrial respiratory chain complex II, succinate dehydrogenase complex (ubiquinone)	0005749		1	1	0.129327
cellular_component	mitochondrial respiratory chain complex IV	0005751	1		1	0.0986503
cellular_component	monomeric IgA immunoglobulin complex	0071748	1		1	0.0171594
cellular_component	nuclear cohesin complex	0000798	1		1	0.114121
cellular_component	pentameric IgM immunoglobulin complex	0071756	1		1	0.0171594
cellular_component	plant-type vacuole membrane	0009705		1	1	0.841039
cellular_component	polar nucleus	0043078		1	1	0.114121
cellular_component	pollen tube tip	0090404	1		1	0.20154
cellular_component	polysome	0005844	1		1	0.187592
cellular_component	preribosome, large subunit precursor	0030687	1		1	0.463988
cellular_component	proteasome complex	0000502	1		1	0.454615
cellular_component	proteasome core complex	0005839	1		1	0.292712
cellular_component	proton-transporting ATP synthase complex, coupling factor F(o)	0045263	1		1	0.08291
cellular_component	replication fork protection complex	0031298		1	1	0.158962
cellular_component	respiratory chain complex III	0045275	1		1	0.0506022
cellular_component	RISC complex	0016442	1		1	0.782633
cellular_component	RNA nuclear export complex	0042565	1		1	0.08291
cellular_component	sarcolemma	0042383	1		1	0.0506022
cellular_component	secretory dimeric IgA immunoglobulin complex	0071752	1		1	0.0171594
cellular_component	small-subunit processome	0032040	1		1	0.62762
cellular_component	SNARE complex	0031201	1		1	0.62762
cellular_component	spliceosomal complex	0005681	1		1	0.652593
cellular_component	terminal web	1990357	1		1	0.0171594
cellular_component	transcription factor complex	0005667	1		1	0.454615
cellular_component	U1 snRNP	0005685		1	1	0.362547
cellular_component	U2-type prespliceosome	0071004		1	1	0.362547
cellular_component	Z disc	0030018	1		1	0.0340251
biological_process	biological_process	0008150	16	5	21	1
biological_process	regulation of transcription, DNA-templated	0006355	16	5	21	0.82563
biological_process	transcription, DNA-templated	0006351	13	7	20	0.561802
biological_process	translation	0006412	19		19	4.1881e-05
biological_process	response to heat	0009408	13	2	15	5.02427e-06
biological_process	signal transduction	0007165	8	5	13	0.00729282
biological_process	defense response	0006952	8	3	11	0.659203
biological_process	oxidation-reduction process	0055114	10	1	11	0.579927
biological_process	cell wall organization	0071555	4	6	10	0.00239331
biological_process	flavonoid biosynthetic process	0009813	7	3	10	0.00487714
biological_process	flavonoid glucuronidation	0052696	6	3	9	0.00812333
biological_process	response to bacterium	0009617	4	5	9	3.17125e-05
biological_process	response to high light intensity	0009644	9		9	1.14009e-05
biological_process	response to hydrogen peroxide	0042542	9		9	1.03036e-05
biological_process	defense response to fungus	0050832	6	2	8	0.0119892
biological_process	response to cadmium ion	0046686	5	3	8	0.122422
biological_process	defense response to bacterium	0042742	5	2	7	0.16118
biological_process	cytoplasmic translation	0002181	6		6	0.000936626
biological_process	innate immune response	0045087	6		6	0.00158756
biological_process	lipid catabolic process	0016042	3	3	6	0.0156277
biological_process	protein folding	0006457	4	2	6	0.262814
biological_process	response to salt stress	0009651	5	1	6	0.54385
biological_process	RNA-dependent DNA biosynthetic process	0006278	4	2	6	2.19803e-05
biological_process	embryo development ending in seed dormancy	0009793	5		5	0.628294
biological_process	response to wounding	0009611	2	3	5	0.209896
biological_process	B cell receptor signaling pathway	0050853	4		4	4.20979e-07
biological_process	complement activation, classical pathway	0006958	4		4	4.20979e-07
biological_process	DNA integration	0015074	2	2	4	0.00325789
biological_process	lignin biosynthetic process	0009809	3	1	4	0.0417444
biological_process	phagocytosis, engulfment	0006911	4		4	4.20979e-07
biological_process	phagocytosis, recognition	0006910	4		4	4.20979e-07
biological_process	positive regulation of B cell activation	0050871	4		4	4.20979e-07
biological_process	protein phosphorylation	0006468	4		4	0.999275
biological_process	proteolysis	0006508	3	1	4	0.630572
biological_process	proteolysis involved in cellular protein catabolic process	0051603	3	1	4	0.0833551
biological_process	proton transmembrane transport	1902600	4		4	0.00293508
biological_process	regulation of transcription by RNA polymerase II	0006357	2	2	4	0.426973
biological_process	response to abscisic acid	0009737	2	2	4	0.766259
biological_process	response to desiccation	0009269	3	1	4	0.000215816
biological_process	SCF-dependent proteasomal ubiquitin-dependent protein catabolic process	0031146	2	2	4	0.295247
biological_process	secondary metabolite biosynthetic process	0044550	2	2	4	0.151692
biological_process	transmembrane transport	0055085	2	2	4	0.59555
biological_process	aerobic respiration	0009060	2	1	3	0.0087127
biological_process	cellulose biosynthetic process	0030244	1	2	3	0.0872381
biological_process	chloroplast organization	0009658	3		3	0.395477
biological_process	dephosphorylation	0016311	2	1	3	0.0418648
biological_process	DNA mediated transformation	0009294		3	3	0.017206
biological_process	DNA repair	0006281	2	1	3	0.548553
biological_process	double-strand break repair via homologous recombination	0000724	3		3	0.0491707
biological_process	glucosinolate catabolic process	0019762	3		3	0.00337741
biological_process	immune response	0006955	3		3	0.0015852
biological_process	metabolic process	0008152	3		3	0.118969
biological_process	mitochondrial translational elongation	0070125	2	1	3	0.000549959
biological_process	multicellular organism development	0007275	2	1	3	0.809783
biological_process	plant-type primary cell wall biogenesis	0009833	1	2	3	0.0271498
biological_process	positive regulation of transcription, DNA-templated	0045893	1	2	3	0.689272
biological_process	protein ubiquitination	0016567	3		3	0.886996
biological_process	response to cold	0009409	2	1	3	0.861861
biological_process	response to hormone	0009725	3		3	0.00688034
biological_process	response to jasmonic acid	0009753	1	2	3	0.15426
biological_process	response to oxidative stress	0006979	3		3	0.59182
biological_process	response to stress	0006950	1	2	3	0.0418648
biological_process	response to virus	0009615	2	1	3	0.16668
biological_process	response to water deprivation	0009414	2	1	3	0.794423
biological_process	ribosomal small subunit assembly	0000028	3		3	0.0351529
biological_process	root development	0048364	2	1	3	0.404705
biological_process	translational elongation	0006414	3		3	0.03305
biological_process	antigen processing and presentation of peptide antigen via MHC class I	0002474	2		2	0.00172224
biological_process	cell differentiation	0030154	1	1	2	0.881356
biological_process	cell division	0051301	1	1	2	0.848497
biological_process	cell redox homeostasis	0045454	2		2	0.555555
biological_process	cell surface receptor signaling pathway	0007166	1	1	2	0.680374
biological_process	cell wall organization or biogenesis	0071554	1	1	2	0.236982
biological_process	defense response to fungus, incompatible interaction	0009817	2		2	0.0828814
biological_process	ethylene-activated signaling pathway	0009873	1	1	2	0.727858
biological_process	flower development	0009908		2	2	0.724429
biological_process	gluconeogenesis	0006094	2		2	0.0828814
biological_process	glucosinolate biosynthetic process	0019761	1	1	2	0.0042085
biological_process	intracellular protein transport	0006886	2		2	0.750866
biological_process	jasmonic acid biosynthetic process	0009695	2		2	0.132332
biological_process	jasmonic acid mediated signaling pathway	0009867	1	1	2	0.319654
biological_process	lipid metabolic process	0006629	1	1	2	0.589729
biological_process	methylation	0032259	2		2	0.799873
biological_process	mitochondrial electron transport, NADH to ubiquinone	0006120	2		2	0.0455246
biological_process	mitochondrial electron transport, succinate to ubiquinone	0006121	1	1	2	0.00283783
biological_process	negative regulation of flower development	0009910	1	1	2	0.0679953
biological_process	negative regulation of transcription, DNA-templated	0045892		2	2	0.630745
biological_process	N-terminal protein amino acid acetylation	0006474	1	1	2	0.0455246
biological_process	oligosaccharide biosynthetic process	0009312	2		2	0.00172224
biological_process	oxalate metabolic process	0033609		2	2	0.0266072
biological_process	phenylpropanoid biosynthetic process	0009699	1	1	2	0.0586287
biological_process	phosphatidylcholine metabolic process	0046470	1	1	2	0.00767921
biological_process	plant-type hypersensitive response	0009626	2		2	0.313335
biological_process	polarity specification of adaxial/abaxial axis	0009944	2		2	0.0541288
biological_process	pollen development	0009555	1	1	2	0.560558
biological_process	polysaccharide biosynthetic process	0000271	1	1	2	0.126548
biological_process	positive regulation of respiratory burst	0060267	2		2	0.000871019
biological_process	positive regulation of transcription by RNA polymerase II	0045944		2	2	0.351013
biological_process	protein refolding	0042026	2		2	0.132332
biological_process	red, far-red light phototransduction	0009585	1	1	2	0.30066
biological_process	respiratory electron transport chain	0022904	1	1	2	0.0120648
biological_process	response to light stimulus	0009416	2		2	0.903576
biological_process	response to osmotic stress	0006970		2	2	0.514095
biological_process	response to red or far red light	0009639	1	1	2	0.224291
biological_process	response to temperature stimulus	0009266	2		2	0.126548
biological_process	response to unfolded protein	0006986	2		2	0.0728511
biological_process	response to UV	0009411	2		2	0.0880458
biological_process	telomere maintenance	0000723	1	1	2	0.0541288
biological_process	transmembrane receptor protein tyrosine kinase signaling pathway	0007169	2		2	0.720962
biological_process	transport	0006810	1	1	2	0.71392
biological_process	tricarboxylic acid cycle	0006099	1	1	2	0.098649
biological_process	ubiquitin-dependent protein catabolic process	0006511	2		2	0.734609
biological_process	wax biosynthetic process	0010025	2		2	0.0679953
biological_process	abaxial cell fate specification	0010158	1		1	0.144273
biological_process	abscisic acid-activated signaling pathway	0009738	1		1	0.967454
biological_process	actin filament organization	0007015	1		1	0.280353
biological_process	activation of protein kinase activity	0032147	1		1	0.0986503
biological_process	adaptive immune response	0002250	1		1	0.0171594
biological_process	aerobic electron transport chain	0019646	1		1	0.0506022
biological_process	amino acid transmembrane transport	0003333		1	1	0.712986
biological_process	angiogenesis	0001525	1		1	0.0986503
biological_process	animal organ regeneration	0031100		1	1	0.0668955
biological_process	anther development	0048653	1		1	0.316799
biological_process	antibacterial humoral response	0019731	1		1	0.0340251
biological_process	antigen processing and presentation	0019882	1		1	0.0171594
biological_process	aromatic amino acid family biosynthetic process	0009073		1	1	0.241967
biological_process	aromatic compound biosynthetic process	0019438		1	1	0.292712
biological_process	ATP biosynthetic process	0006754	1		1	0.114121
biological_process	ATP synthesis coupled proton transport	0015986	1		1	0.267778
biological_process	autophagy	0006914	1		1	0.173401
biological_process	auxin-activated signaling pathway	0009734	1		1	0.895309
biological_process	bile acid metabolic process	0008206	1		1	0.0171594
biological_process	branched-chain amino acid biosynthetic process	0009082		1	1	0.144273
biological_process	brassinosteroid biosynthetic process	0016132	1		1	0.445078
biological_process	brassinosteroid homeostasis	0010268	1		1	0.39484
biological_process	carbohydrate mediated signaling	0009756	1		1	0.0340251
biological_process	carbohydrate transmembrane transport	0034219	1		1	0.228723
biological_process	cell differentiation involved in embryonic placenta development	0060706	1		1	0.0340251
biological_process	cell fate commitment	0045165	1		1	0.114121
biological_process	cell wall biogenesis	0042546	1		1	0.549322
biological_process	cell wall thickening	0052386		1	1	0.129327
biological_process	cellular iron ion homeostasis	0006879	1		1	0.241967
biological_process	cellular manganese ion homeostasis	0030026	1		1	0.129327
biological_process	cellular phosphate ion homeostasis	0030643	1		1	0.0506022
biological_process	cellular protein metabolic process	0044267		1	1	0.158962
biological_process	cellular response to iron ion	0071281	1		1	0.328534
biological_process	cellular response to nitrogen starvation	0006995		1	1	0.280353
biological_process	cellular response to phosphate starvation	0016036		1	1	0.435375
biological_process	cellular response to potassium ion starvation	0051365		1	1	0.0506022
biological_process	cellular response to unfolded protein	0034620		1	1	0.30486
biological_process	cellulose catabolic process	0030245		1	1	0.280353
biological_process	centromeric sister chromatid cohesion	0070601	1		1	0.0340251
biological_process	chitin catabolic process	0006032		1	1	0.362547
biological_process	cholesterol biosynthetic process	0006695	1		1	0.0506022
biological_process	cholesterol efflux	0033344	1		1	0.0668955
biological_process	cholesterol homeostasis	0042632	1		1	0.0668955
biological_process	chorismate biosynthetic process	0009423		1	1	0.114121
biological_process	copulation	0007620	1		1	0.0171594
biological_process	cuticle development	0042335	1		1	0.362547
biological_process	cutin biosynthetic process	0010143	1		1	0.292712
biological_process	cytolysis	0019835	1		1	0.0171594
biological_process	defense response by callose deposition in cell wall	0052544		1	1	0.0986503
biological_process	defense response to bacterium, incompatible interaction	0009816		1	1	0.557072
biological_process	defense response to Gram-negative bacterium	0050829		1	1	0.187592
biological_process	defense response to insect	0002213		1	1	0.08291
biological_process	developmental process	0032502	1		1	0.435375
biological_process	digestion	0007586	1		1	0.0171594
biological_process	DNA recombination	0006310		1	1	0.600856
biological_process	double-strand break repair	0006302	1		1	0.473201
biological_process	double-strand break repair via break-induced replication	0000727		1	1	0.114121
biological_process	drug transmembrane transport	0006855		1	1	0.640322
biological_process	electron transport chain	0022900	1		1	0.187592
biological_process	ER overload response	0006983	1		1	0.114121
biological_process	far-red light signaling pathway	0010018	1		1	0.351404
biological_process	fructose metabolic process	0006000	1		1	0.267778
biological_process	gibberellic acid mediated signaling pathway	0009740	1		1	0.508499
biological_process	gibberellin biosynthetic process	0009686	1		1	0.241967
biological_process	glomerular filtration	0003094	1		1	0.0171594
biological_process	glucose import	0046323		1	1	0.586763
biological_process	glutathione biosynthetic process	0006750		1	1	0.0506022
biological_process	glutathione metabolic process	0006749	1		1	0.579532
biological_process	glycolytic process	0006096	1		1	0.697639
biological_process	hematopoietic progenitor cell differentiation	0002244	1		1	0.0986503
biological_process	high-density lipoprotein particle assembly	0034380	1		1	0.0668955
biological_process	histone deacetylation	0016575		1	1	0.415458
biological_process	hormone-mediated signaling pathway	0009755	1		1	0.292712
biological_process	humoral immune response	0006959	1		1	0.0171594
biological_process	hyperosmotic response	0006972	1		1	0.215249
biological_process	I-kappaB kinase/NF-kappaB signaling	0007249	1		1	0.0171594
biological_process	immunoglobulin production	0002377	1		1	0.0340251
biological_process	indole phytoalexin biosynthetic process	0009700		1	1	0.0340251
biological_process	induction of programmed cell death	0012502	1		1	0.0506022
biological_process	intracellular sequestering of iron ion	0006880	1		1	0.187592
biological_process	iron ion transport	0006826	1		1	0.144273
biological_process	isoleucine biosynthetic process	0009097		1	1	0.144273
biological_process	L-cystine transport	0015811	1		1	0.0506022
biological_process	leaf development	0048366		1	1	0.758749
biological_process	leaf morphogenesis	0009965	1		1	0.579532
biological_process	leucine biosynthetic process	0009098		1	1	0.129327
biological_process	lignan biosynthetic process	0009807		1	1	0.129327
biological_process	lipid transport	0006869	1		1	0.697639
biological_process	lipoprotein metabolic process	0042157	1		1	0.129327
biological_process	liver development	0001889		1	1	0.0171594
biological_process	maintenance of shoot apical meristem identity	0010492	1		1	0.254984
biological_process	manganese ion transmembrane transport	0071421	1		1	0.114121
biological_process	maturation of LSU-rRNA	0000470	1		1	0.373498
biological_process	maturation of LSU-rRNA from tricistronic rRNA transcript (SSU-rRNA, 5.8S rRNA, LSU-rRNA)	0000463	1		1	0.228723
biological_process	menthol biosynthetic process	0031525	1		1	0.0506022
biological_process	meristem maintenance	0010073	1		1	0.30486
biological_process	miRNA export from nucleus	0061716	1		1	0.0668955
biological_process	mitochondrial electron transport, ubiquinol to cytochrome c	0006122	1		1	0.20154
biological_process	mitochondria-nucleus signaling pathway	0031930	1		1	0.114121
biological_process	mitotic DNA replication initiation	1902975		1	1	0.0340251
biological_process	mRNA 5'-splice site recognition	0000395		1	1	0.129327
biological_process	mRNA splicing, via spliceosome	0000398	1		1	0.820463
biological_process	multidimensional cell growth	0009825		1	1	0.384261
biological_process	negative regulation of apoptotic process	0043066	1		1	0.254984
biological_process	negative regulation of calcium ion import	0090281	1		1	0.0171594
biological_process	negative regulation of defense response	0031348	1		1	0.292712
biological_process	negative regulation of ethylene-activated signaling pathway	0010105		1	1	0.340068
biological_process	negative regulation of nitric oxide mediated signal transduction	0010751	1		1	0.0171594
biological_process	negative regulation of peptidase activity	0010466	1		1	0.0340251
biological_process	negative regulation of peptidyl-tyrosine phosphorylation	0050732	1		1	0.0171594
biological_process	negative regulation of programmed cell death	0043069	1		1	0.30486
biological_process	negative regulation of serine-type endopeptidase activity	1900004	1		1	0.0171594
biological_process	negative regulation of short-day photoperiodism, flowering	0048577		1	1	0.144273
biological_process	negative regulation of sinapate ester biosynthetic process	1903086		1	1	0.0668955
biological_process	negative regulation of transcription by RNA polymerase II	0000122		1	1	0.435375
biological_process	neuron projection regeneration	0031102	1		1	0.0506022
biological_process	nodulation	0009877	1		1	0.173401
biological_process	Notch signaling pathway	0007219	1		1	0.08291
biological_process	N-terminal peptidyl-methionine acetylation	0017196		1	1	0.499902
biological_process	oligopeptide transport	0006857		1	1	0.712986
biological_process	one-carbon metabolic process	0006730	1		1	0.280353
biological_process	ovulation from ovarian follicle	0001542		1	1	0.0171594
biological_process	oxidative phosphorylation	0006119	1		1	0.0506022
biological_process	oxylipin biosynthetic process	0031408	1		1	0.473201
biological_process	pancreas development	0031016		1	1	0.0171594
biological_process	pattern specification process	0007389	1		1	0.158962
biological_process	pentose-phosphate shunt	0006098	1		1	0.173401
biological_process	peptide catabolic process	0043171	1		1	0.173401
biological_process	peptidyl-methionine modification	0018206	1		1	0.0506022
biological_process	phloem development	0010088	1		1	0.241967
biological_process	phospholipid catabolic process	0009395		1	1	0.114121
biological_process	phospholipid dephosphorylation	0046839	1		1	0.114121
biological_process	phospholipid efflux	0033700	1		1	0.0668955
biological_process	phospholipid metabolic process	0006644	1		1	0.215249
biological_process	photorespiration	0009853	1		1	0.373498
biological_process	plant-type cell wall biogenesis	0009832		1	1	0.614469
biological_process	plant-type cell wall organization or biogenesis	0071669		1	1	0.20154
biological_process	plant-type secondary cell wall biogenesis	0009834		1	1	0.646511
biological_process	plasmodesmata-mediated intercellular transport	0010497		1	1	0.144273
biological_process	pollen tube guidance	0010183	1		1	0.351404
biological_process	positive regulation of abscisic acid biosynthetic process	0010116		1	1	0.129327
biological_process	positive regulation of abscisic acid-activated signaling pathway	0009789	1		1	0.435375
biological_process	positive regulation of autophagy	0010508	1		1	0.144273
biological_process	positive regulation of cholesterol esterification	0010873	1		1	0.0668955
biological_process	positive regulation of circadian rhythm	0042753	1		1	0.405238
biological_process	positive regulation of cytokine production involved in inflammatory response	1900017	1		1	0.0171594
biological_process	positive regulation of fatty acid biosynthetic process	0045723	1		1	0.158962
biological_process	positive regulation of inflammatory response	0050729	1		1	0.0171594
biological_process	positive regulation of lipoprotein lipase activity	0051006	1		1	0.0340251
biological_process	positive regulation of nitrogen utilization	0045848		1	1	0.0340251
biological_process	positive regulation of programmed cell death	0043068		1	1	0.173401
biological_process	positive regulation of protein kinase activity	0045860	1		1	0.0668955
biological_process	positive regulation of protein oligomerization	0032461	1		1	0.0171594
biological_process	positive regulation of protein targeting to mitochondrion	1903955	1		1	0.0171594
biological_process	positive regulation of transcription initiation from RNA polymerase II promoter	0060261	1		1	0.08291
biological_process	positive regulation of transferase activity	0051347	1		1	0.0506022
biological_process	positive regulation of translation	0045727	1		1	0.254984
biological_process	positive regulation of triglyceride catabolic process	0010898	1		1	0.0340251
biological_process	post-embryonic development	0009791		1	1	0.516948
biological_process	post-translational protein modification	0043687		1	1	0.187592
biological_process	production of siRNA involved in RNA interference	0030422	1		1	0.866421
biological_process	progesterone metabolic process	0042448		1	1	0.0171594
biological_process	proteasomal protein catabolic process	0010498	1		1	0.0506022
biological_process	proteasome-mediated ubiquitin-dependent protein catabolic process	0043161		1	1	0.966297
biological_process	protein catabolic process	0030163	1		1	0.750219
biological_process	protein deubiquitination	0016579	1		1	0.586763
biological_process	protein glutathionylation	0010731	1		1	0.0506022
biological_process	protein glycosylation	0006486		1	1	0.766988
biological_process	protein import into mitochondrial inner membrane	0045039		1	1	0.08291
biological_process	protein insertion into membrane	0051205		1	1	0.08291
biological_process	protein oxidation	0018158	1		1	0.0506022
biological_process	protein polyubiquitination	0000209		1	1	0.67022
biological_process	protein transport	0015031		1	1	0.955437
biological_process	red or far-red light signaling pathway	0010017	1		1	0.405238
biological_process	regulation of acrosome reaction	0060046	1		1	0.0171594
biological_process	regulation of autophagy of mitochondrion	1903146	1		1	0.0171594
biological_process	regulation of cellular respiration	0043457	1		1	0.0668955
biological_process	regulation of gene expression	0010468	1		1	0.804158
biological_process	regulation of intestinal cholesterol absorption	0030300	1		1	0.0506022
biological_process	regulation of leaf development	2000024	1		1	0.144273
biological_process	regulation of phenylpropanoid metabolic process	2000762		1	1	0.20154
biological_process	regulation of protein export from nucleus	0046825	1		1	0.114121
biological_process	regulation of root development	2000280		1	1	0.187592
biological_process	regulation of shoot apical meristem development	1902183	1		1	0.129327
biological_process	regulation of store-operated calcium entry	2001256	1		1	0.0171594
biological_process	removal of superoxide radicals	0019430	1		1	0.187592
biological_process	respiratory chain complex IV assembly	0008535	1		1	0.0986503
biological_process	response to cytokinin	0009735	1		1	0.889695
biological_process	response to drug	0042493	1		1	0.173401
biological_process	response to estrogen	0043627	1		1	0.0340251
biological_process	response to external biotic stimulus	0043207	1		1	0.0506022
biological_process	response to freezing	0050826		1	1	0.173401
biological_process	response to fungus	0009620	1		1	0.454615
biological_process	response to gibberellin	0009739	1		1	0.634026
biological_process	response to light intensity	0009642	1		1	0.158962
biological_process	response to nematode	0009624		1	1	0.445078
biological_process	response to organic substance	0010033		1	1	0.0668955
biological_process	response to ozone	0010193		1	1	0.328534
biological_process	response to salicylic acid	0009751		1	1	0.817314
biological_process	response to UV-B	0010224		1	1	0.646511
biological_process	retina homeostasis	0001895	1		1	0.0986503
biological_process	reverse cholesterol transport	0043691	1		1	0.0668955
biological_process	ribosomal large subunit assembly	0000027	1		1	0.557072
biological_process	ribosomal large subunit export from nucleus	0000055	1		1	0.187592
biological_process	ribosomal small subunit biogenesis	0042274	1		1	0.228723
biological_process	RNA interference	0016246	1		1	0.08291
biological_process	RNA modification	0009451	1		1	0.964484
biological_process	root meristem growth	0010449	1		1	0.241967
biological_process	rRNA processing	0006364	1		1	0.745842
biological_process	salicylic acid mediated signaling pathway	0009863		1	1	0.351404
biological_process	sarcomere organization	0045214	1		1	0.0171594
biological_process	seedling development	0090351	1		1	0.20154
biological_process	sexual reproduction	0019953		1	1	0.215249
biological_process	shoot system development	0048367	1		1	0.586763
biological_process	signal transduction involved in regulation of gene expression	0023019	1		1	0.0171594
biological_process	sister chromatid cohesion	0007062	1		1	0.241967
biological_process	SMAD protein signal transduction	0060395		1	1	0.0340251
biological_process	spindle assembly	0051225	1		1	0.129327
biological_process	starch biosynthetic process	0019252	1		1	0.425502
biological_process	stem cell population maintenance	0019827	1		1	0.158962
biological_process	sterol metabolic process	0016125	1		1	0.491155
biological_process	stomatal lineage progression	0010440		1	1	0.08291
biological_process	symbiont process	0044403		1	1	0.0171594
biological_process	triglyceride catabolic process	0019433	1		1	0.0506022
biological_process	triglyceride homeostasis	0070328	1		1	0.0506022
biological_process	UDP-N-acetylglucosamine biosynthetic process	0006048		1	1	0.114121
biological_process	UV protection	0009650	1		1	0.08291
biological_process	vacuolar protein processing	0006624		1	1	0.0668955
biological_process	valine biosynthetic process	0009099		1	1	0.0986503
biological_process	vegetative to reproductive phase transition of meristem	0010228	1		1	0.750219
biological_process	very long-chain fatty acid biosynthetic process	0042761	1		1	0.187592
biological_process	very long-chain fatty acid metabolic process	0000038	1		1	0.241967
biological_process	very-low-density lipoprotein particle remodeling	0034372	1		1	0.0340251
biological_process	vesicle docking	0048278	1		1	0.362547
biological_process	vesicle fusion	0006906	1		1	0.508499
biological_process	viral entry into host cell	0046718	1		1	0.0506022
biological_process	xyloglucan metabolic process	0010411	1		1	0.541438
biological_process	zinc II ion transmembrane transport	0071577		1	1	0.187592
